# Supplementary material for: Simultaneous Enrichment of Cysteine-containing Peptides and Phosphopeptides Using a Cysteine-specific Phosphonate Adaptable Tag (CysPAT) in Combination with titanium dioxide (TiO2) Chromatography
Source: PubMed Central journal article supplement (PMC5054350; doi:10.1074/mcp.m115.054551), 2016-10

# Supplementary Figure S1

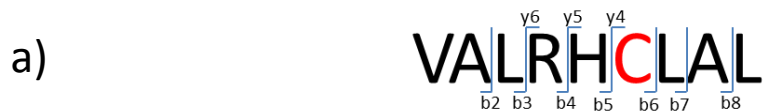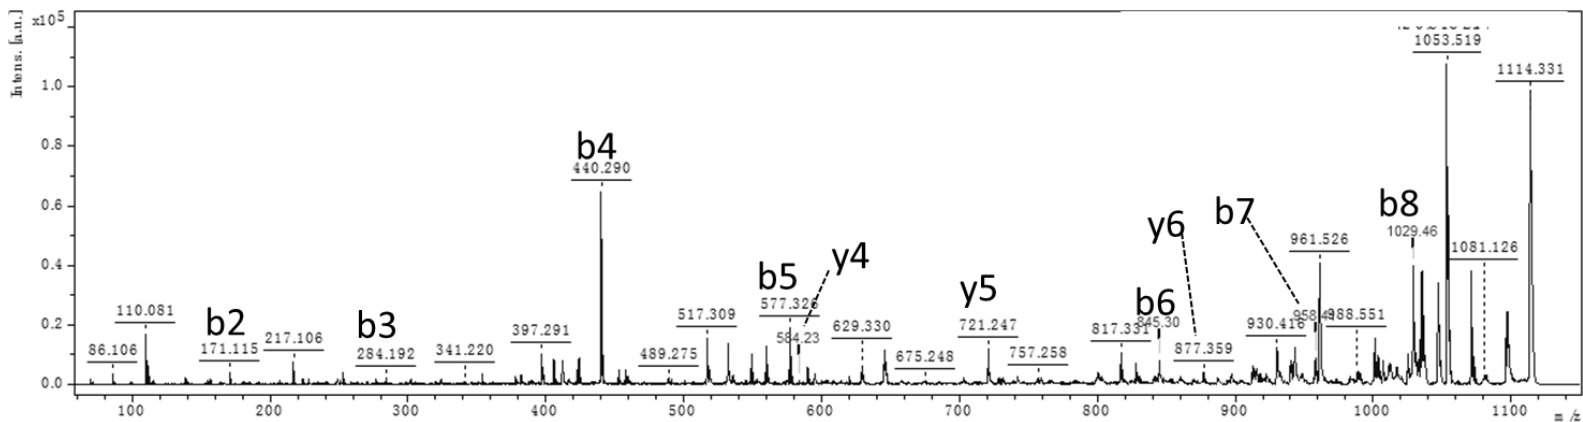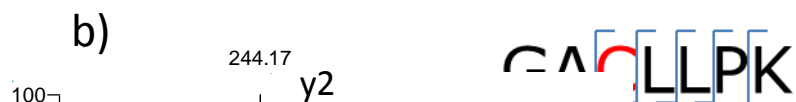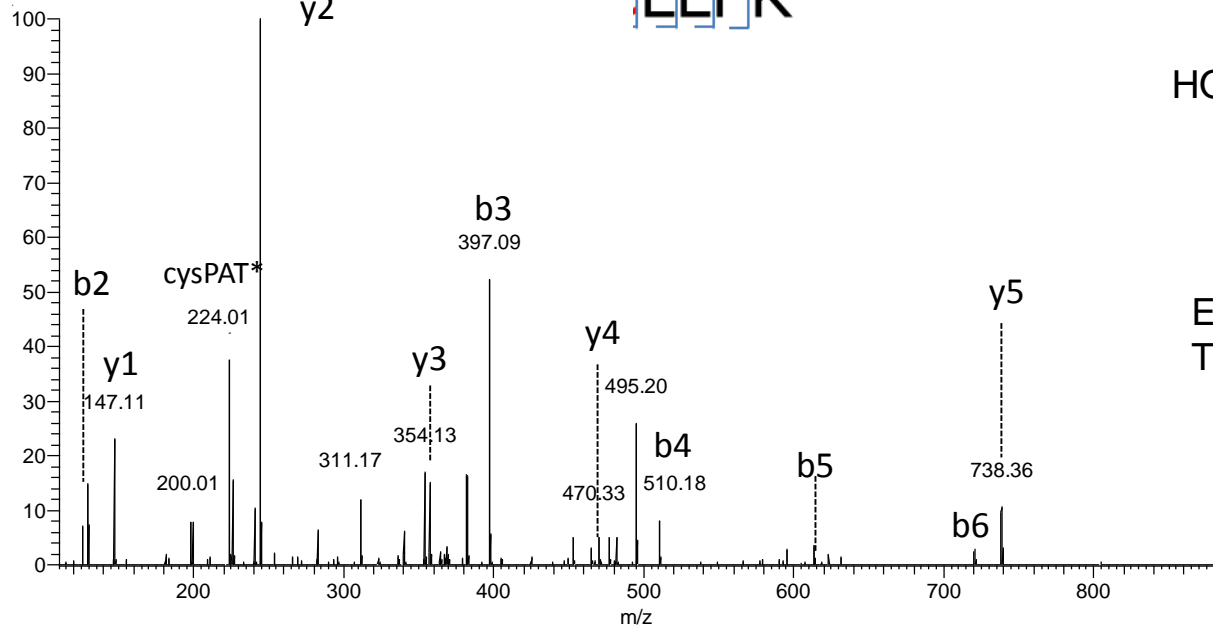

c)

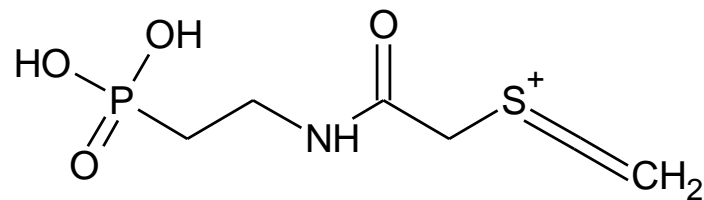

Experimental Mass = 224.014 Da  
Theoretical Mass = 224.01409 Da

## Supplementary Figure S2

P02769 (ALBU\_BOVIN) Serum albumin

MKWVTFISLLLLFSSAYSRGVFRRDTHKSEIAHRFKDLGEEHFKGLVLIAFSQYLQQcPFDEHVKLV

NELTEFAKTcVADESHAGcEKSLHTLFGDELcKVASLRETYGDMADccEKQEPERNEcFLSHKDDS

PDLPKLKPDNTLcDEFKADEKKFWGKYLYEIARRHPYFYAPELLYYANKYNGVFQEccQAEDKGA

cLLPKIETMREKVLASSARQRLRcASIQKFGERALKAWSVARLSQKFPKAEFVEVTKLVTDLTKVHK

EccHGDILLEcADDRADLAKYIcDNQDTISSKLKEccDKPLLEKSHcIAEVEKDAIPENLPPLTADFAED

KDVcKNYQEAKDAFLGSFLYEYSRRHPEYAVSVLLRLAKEYEATLEEccAKDDPHAcYSTVFDKCLKH

LVDEPQNLIKQNcDQFEKLGEGFQNALIVRYTRKVPQVSTPTLVEVSRSLGKVGTRccTKPESER

MPcTEDYLSLILNRLcVLHEKTPVSEKVTKccTESLVNRRPcFSALTPDETYVPKAFDEKLFTFHADIC

TLPDTEKQIKKQTALVELLKHKPKATEEQKKTVMENFVAFVDKccAADDKEAcFAVEGPKLVVSTQTA

LA

# Supplementary Figure S3

a)

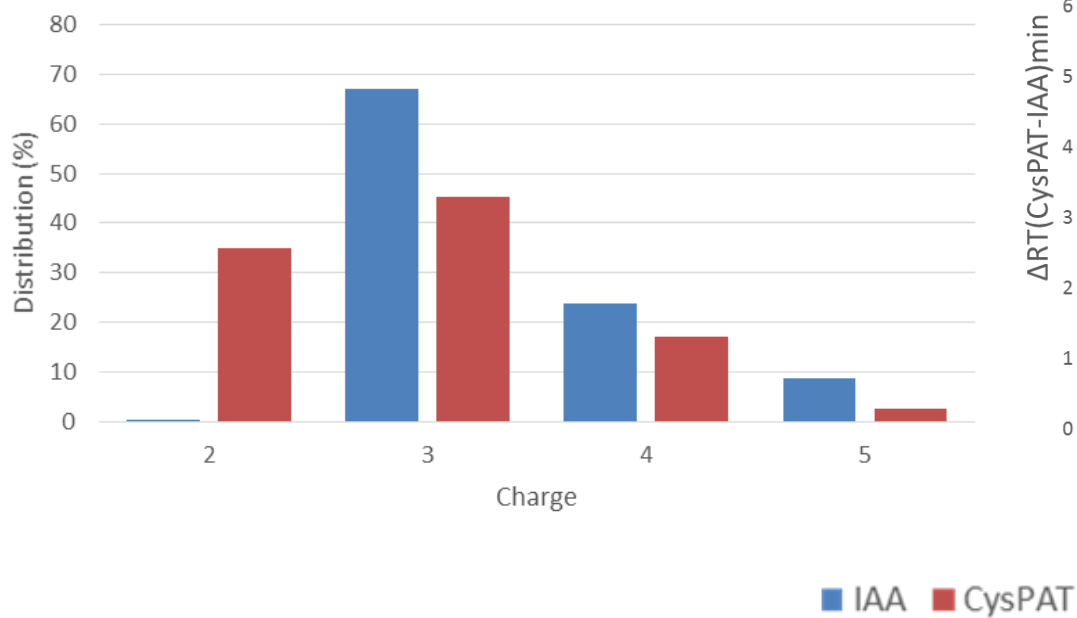

b)

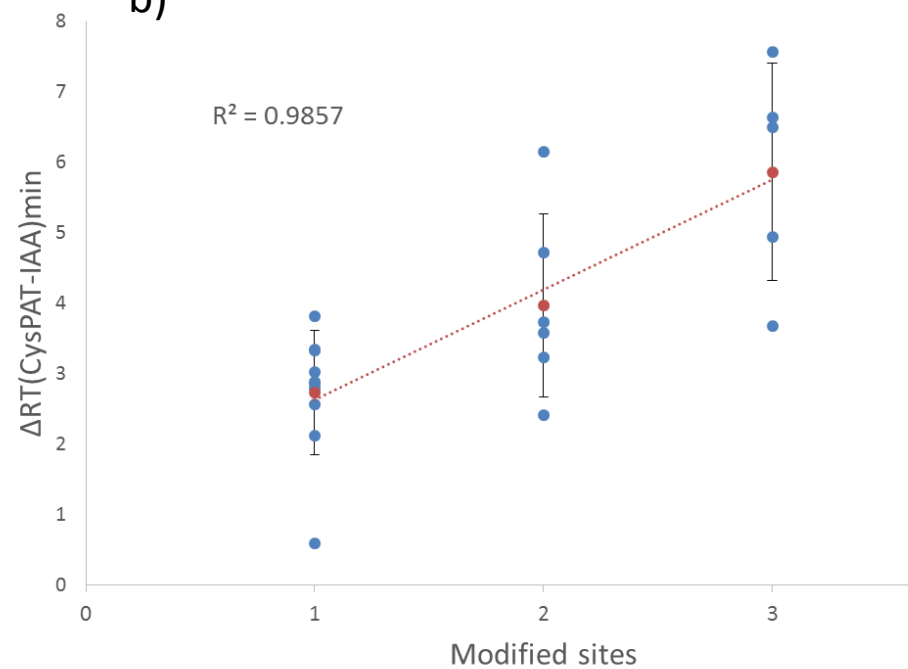

# Supplementary Figure S4

## HILIC fractionation

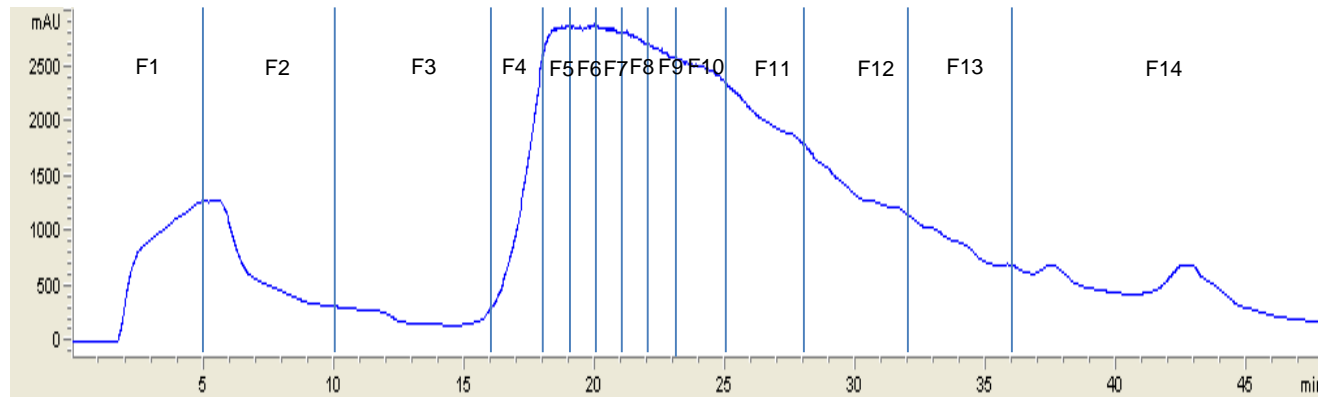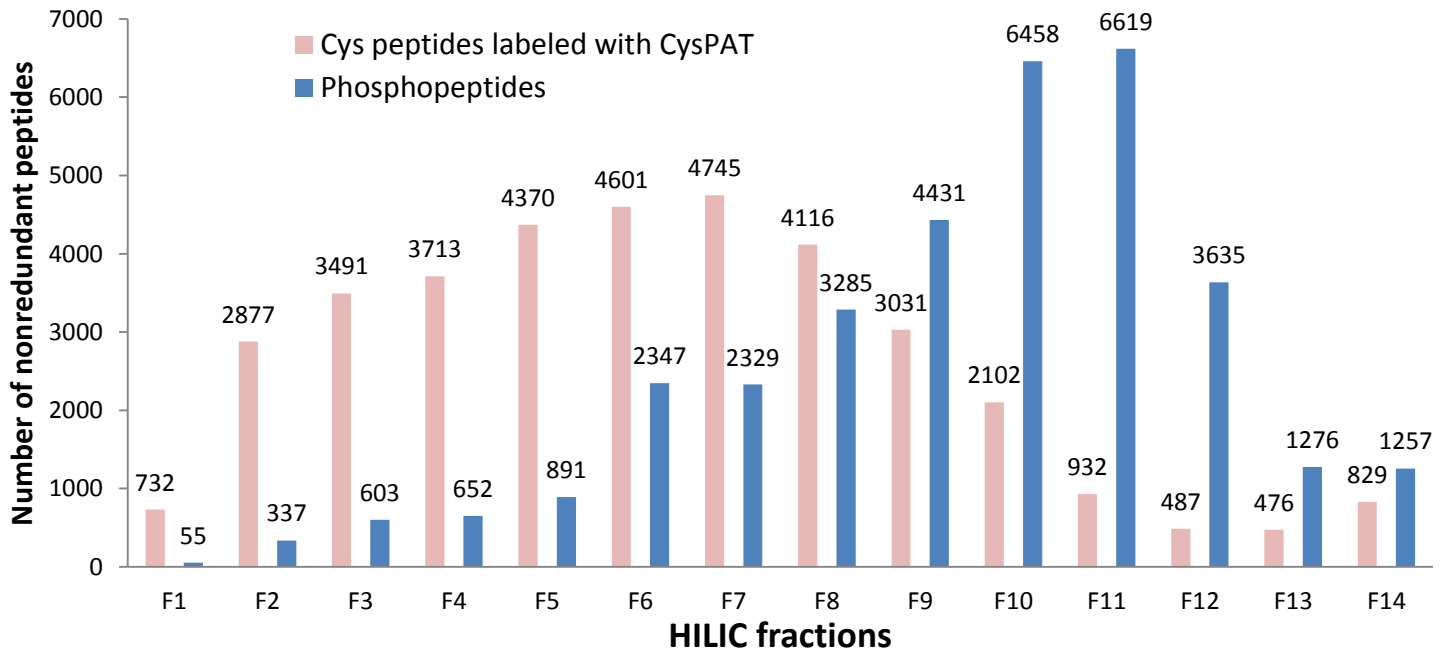

## Supplementary Figure S5

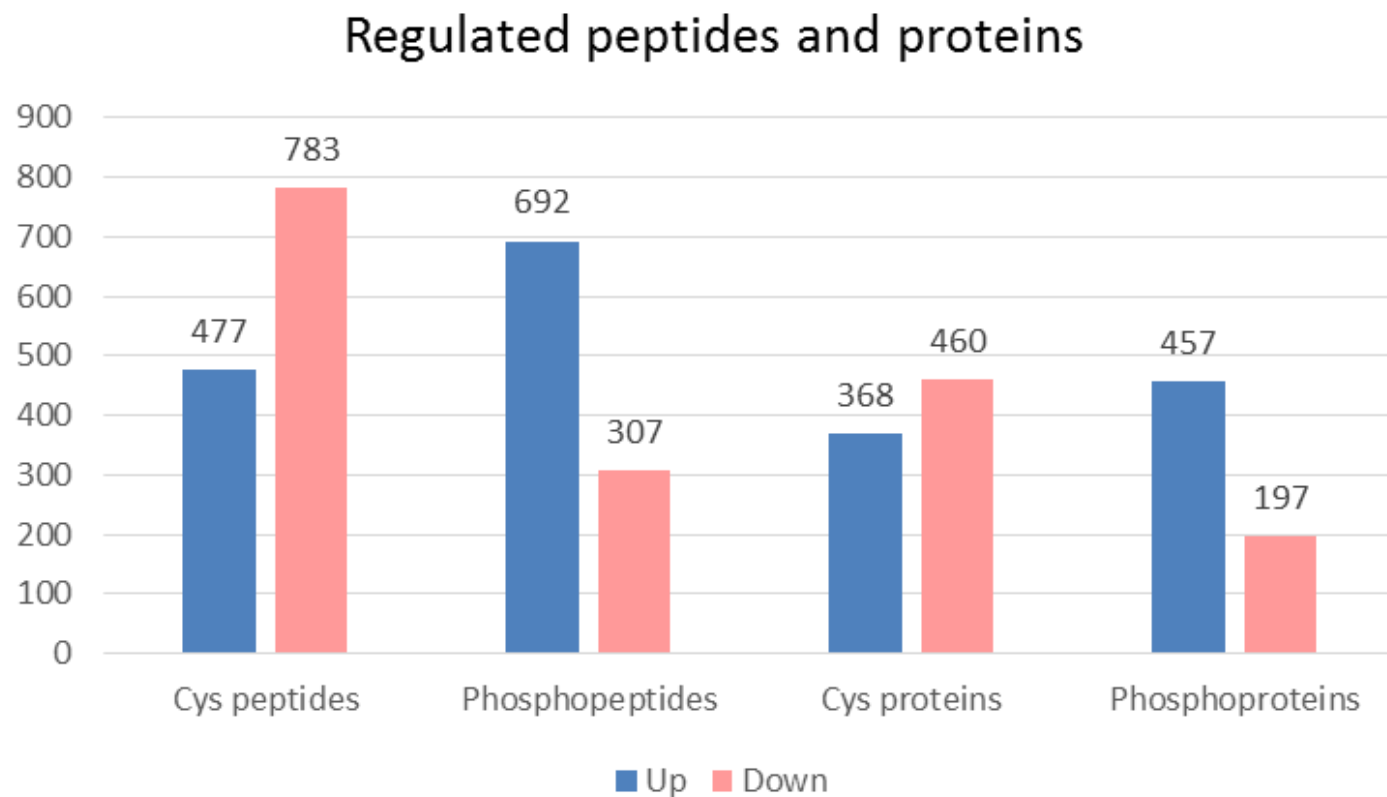

# Supplementary Figure S6

Cys407 of MCM3  
 GVVCID<sup>C</sup>IDEFDK,  
 m/z=645.28, z=2

| Sequence    | Protein | Site | Mean of log <sub>2</sub> (H/L) | STD of log <sub>2</sub> |
|-------------|---------|------|--------------------------------|-------------------------|
| GVV*CIDEFDK | MCM3    | C407 | 0.98                           | 0.11                    |

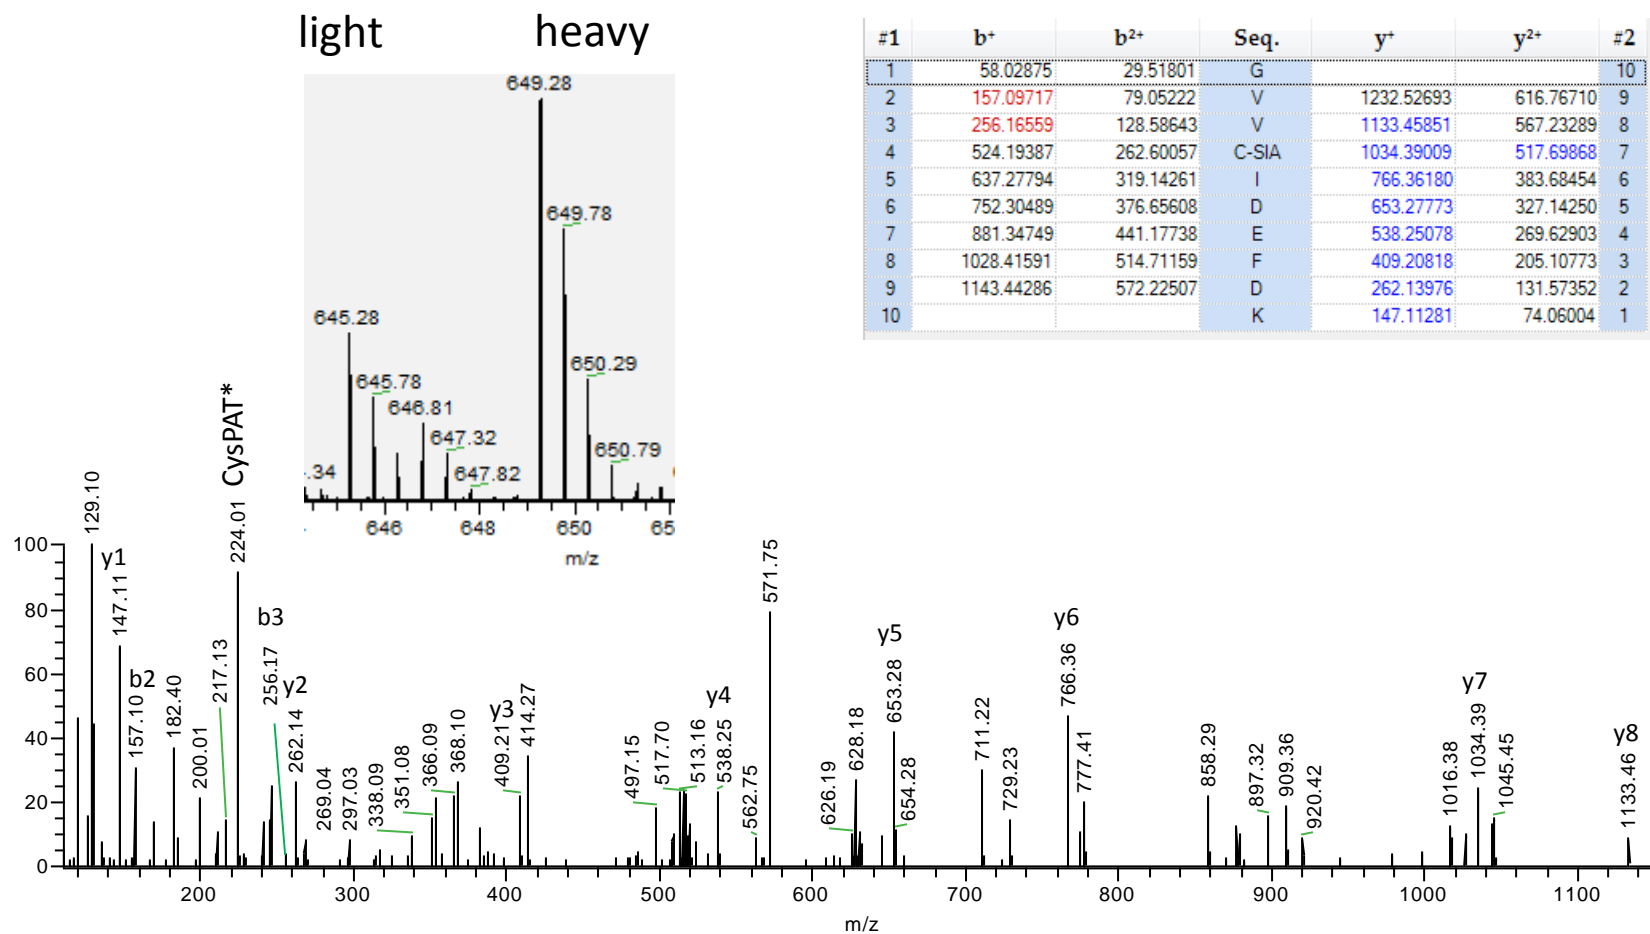

# Supplementary Figure S7

Cys215 of PTP1B/PTPN1  
 ESGLSPEHGPPVVHCSAGIGR,  
 $m/z=780.70$ ,  $z=3$

| Peptides               | PTPs  | Location | log2(H/L) | STD  |
|------------------------|-------|----------|-----------|------|
| ESGSLPEHGPPVVH*CSAGIGR | PTPN1 | C215     | -1.08     | 0.32 |

| #1 | b <sup>+</sup> | b <sup>2+</sup> | b <sup>3+</sup> | Seq.  | y <sup>+</sup> | y <sup>2+</sup> | y <sup>3+</sup> | #2 |
|----|----------------|-----------------|-----------------|-------|----------------|-----------------|-----------------|----|
| 1  | 130.04988      | 65.52858        | 44.02148        | E     |                |                 |                 | 22 |
| 2  | 217.08191      | 109.04459       | 73.03215        | S     |                |                 |                 | 21 |
| 3  | 274.10338      | 137.55533       | 92.03931        | G     | 2211.03773     | 1106.02250      | 737.68409       | 20 |
| 4  | 361.13541      | 181.07134       | 121.04999       | S     | 2124.00570     | 1062.50649      | 708.67342       | 19 |
| 5  | 474.21948      | 237.61338       | 158.74468       | L     | 1979.95220     | 990.47974       | 660.65558       | 18 |
| 6  | 561.25151      | 281.12939       | 187.75535       | S     | 1866.86813     | 933.93770       | 622.96089       | 17 |
| 7  | 658.30428      | 329.65578       | 220.10628       | P     | 1779.83610     | 890.42169       | 593.95022       | 16 |
| 8  | 787.34688      | 394.17708       | 263.12048       | E     | 1682.78333     | 841.89530       | 561.59929       | 15 |
| 9  | 924.40579      | 462.70653       | 308.80678       | H     | 1553.74073     | 777.37400       | 518.58509       | 14 |
| 10 | 981.42726      | 491.21727       | 327.81394       | G     | 1416.68182     | 708.84455       | 472.89879       | 13 |
| 11 | 1078.48003     | 539.74365       | 360.16486       | P     | 1359.66035     | 680.33381       | 453.89163       | 12 |
| 12 | 1177.54845     | 589.27786       | 393.18767       | V     | 1262.60758     | 631.80743       | 421.54071       | 11 |
| 13 | 1276.61687     | 638.81207       | 426.21047       | V     | 1163.53916     | 582.27322       | 388.51790       | 10 |
| 14 | 1375.68529     | 688.34628       | 459.23328       | V     | 1064.47074     | 532.73901       | 355.49510       | 9  |
| 15 | 1512.74420     | 756.87574       | 504.91958       | H     | 965.40232      | 483.20480       | 322.47229       | 8  |
| 16 | 1780.77248     | 890.88988       | 594.26234       | C-SIA | 828.34341      | 414.67534       | 276.78599       | 7  |
| 17 | 1867.80451     | 934.40589       | 623.27302       | S     | 560.31512      | 280.66120       | 187.44322       | 6  |
| 18 | 1938.84163     | 969.92445       | 646.95206       | A     | 473.28309      | 237.14518       | 158.43255       | 5  |
| 19 | 1995.86310     | 998.43519       | 665.95922       | G     | 402.24597      | 201.62662       | 134.75351       | 4  |
| 20 | 2108.94717     | 1054.97722      | 703.65391       | I     | 345.22450      | 173.11589       | 115.74635       | 3  |
| 21 | 2165.96864     | 1083.48796      | 722.66106       | G     | 232.14043      | 116.57385       | 78.05166        | 2  |
| 22 |                |                 |                 | R     | 175.11896      | 88.06312        | 59.04450        | 1  |

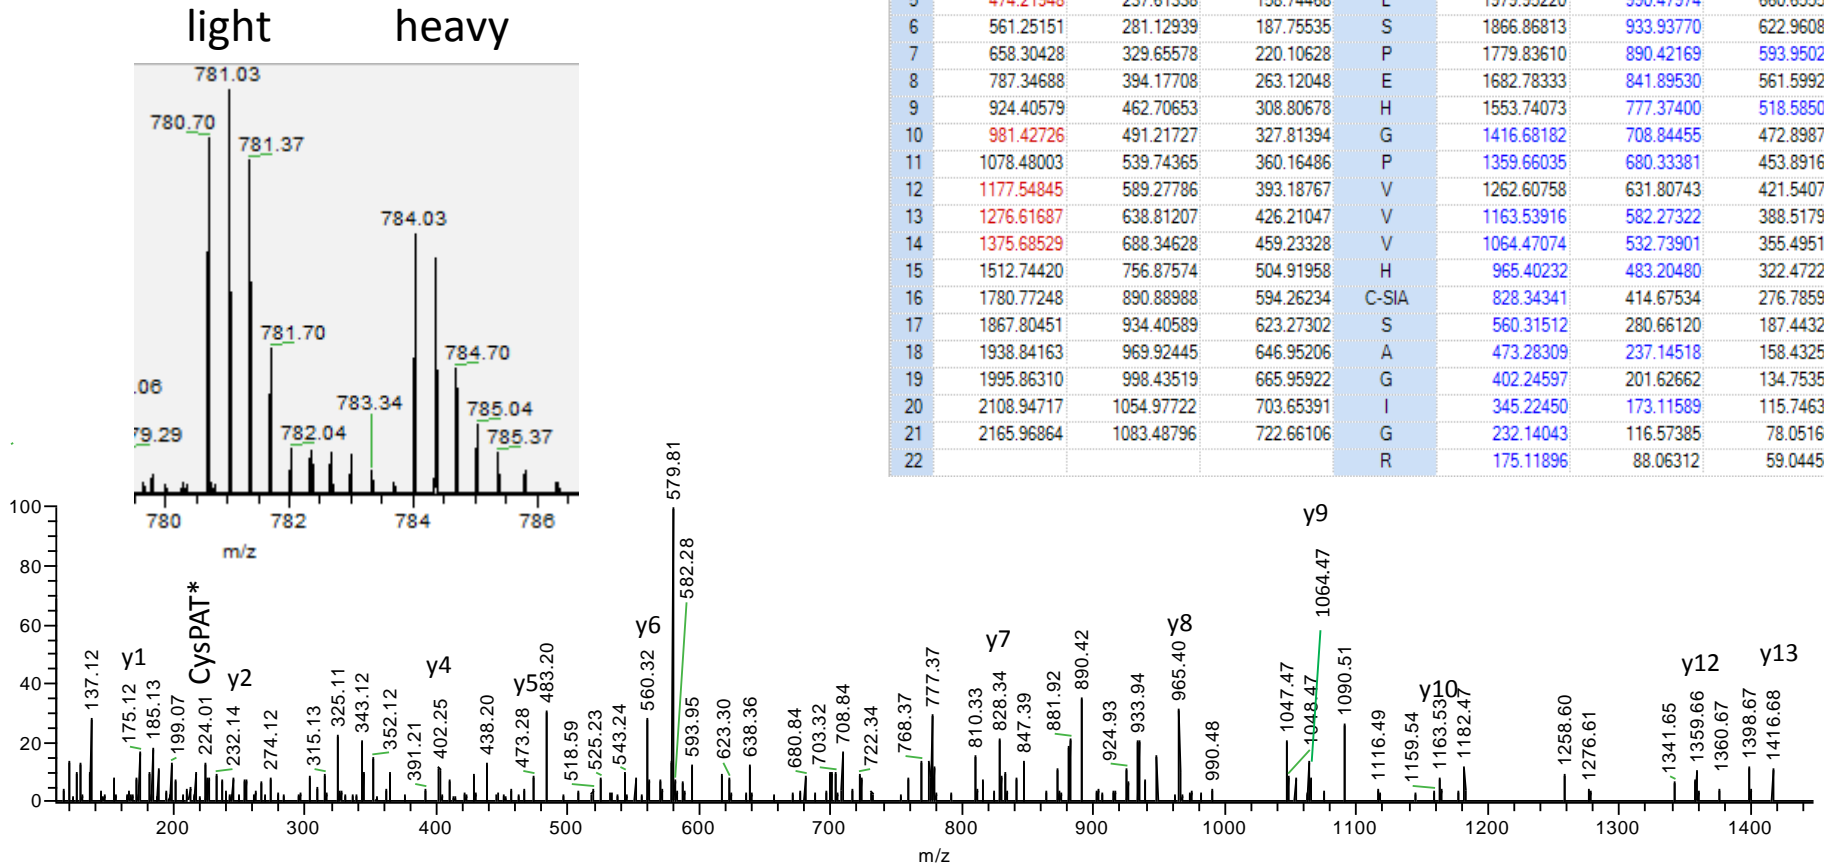

# Supplementary Figure S8

S2152 and C2160 from Filamin A

RAPSVANVGSHCDLSLK

m/z=666.97, z=3

| Sequence PTM        | Sites        | Protein GI | Mean of log2 (H/L) | STD of log2 |
|---------------------|--------------|------------|--------------------|-------------|
| RAP*SVANVGSH*CDLSLK | S2152, C2160 | P21333     | -1.23              | 0.15        |

| #1 | b <sup>+</sup> | b <sup>2+</sup> | b <sup>3+</sup> | Seq.    | y <sup>+</sup> | y <sup>2+</sup> | y <sup>3+</sup> | #2 |
|----|----------------|-----------------|-----------------|---------|----------------|-----------------|-----------------|----|
| 1  | 157.10840      | 79.05784        | 53.04098        | R       |                |                 |                 | 17 |
| 2  | 228.14552      | 114.57640       | 76.72002        | A       | 1842.78577     | 921.89652       | 614.93344       | 16 |
| 3  | 325.19829      | 163.10278       | 109.07095       | P       | 1771.74865     | 886.37796       | 591.25440       | 15 |
| 4  | 492.19665      | 246.60196       | 164.73707       | S-Phosp | 1674.69588     | 837.85158       | 558.90348       | 14 |
| 5  | 591.26507      | 296.13617       | 197.75987       | V       | 1507.69752     | 754.35240       | 503.23736       | 13 |
| 6  | 662.30219      | 331.65473       | 221.43891       | A       | 1408.62910     | 704.81819       | 470.21455       | 12 |
| 7  | 776.34512      | 388.67620       | 259.45322       | N       | 1337.59198     | 669.29963       | 446.53551       | 11 |
| 8  | 875.41354      | 438.21041       | 292.47603       | V       | 1223.54905     | 612.27816       | 408.52120       | 10 |
| 9  | 932.43501      | 466.72114       | 311.48319       | G       | 1124.48063     | 562.74395       | 375.49839       | 9  |
| 10 | 1019.46704     | 510.23716       | 340.49386       | S       | 1067.45916     | 534.23322       | 356.49124       | 8  |
| 11 | 1156.52595     | 578.76661       | 386.18017       | H       | 980.42713      | 490.71720       | 327.48056       | 7  |
| 12 | 1424.55423     | 712.78075       | 475.52293       | C-SIA   | 843.36822      | 422.18775       | 281.79426       | 6  |
| 13 | 1539.58118     | 770.29423       | 513.86525       | D       | 575.33993      | 288.17360       | 192.45149       | 5  |
| 14 | 1652.66525     | 826.83626       | 551.55994       | L       | 460.31298      | 230.66013       | 154.10918       | 4  |
| 15 | 1739.69728     | 870.35228       | 580.57061       | S       | 347.22891      | 174.11809       | 116.41449       | 3  |
| 16 | 1852.78135     | 926.89431       | 618.26530       | L       | 260.19688      | 130.60208       | 87.40381        | 2  |
| 17 |                |                 |                 | K       | 147.11281      | 74.06004        | 49.70912        | 1  |

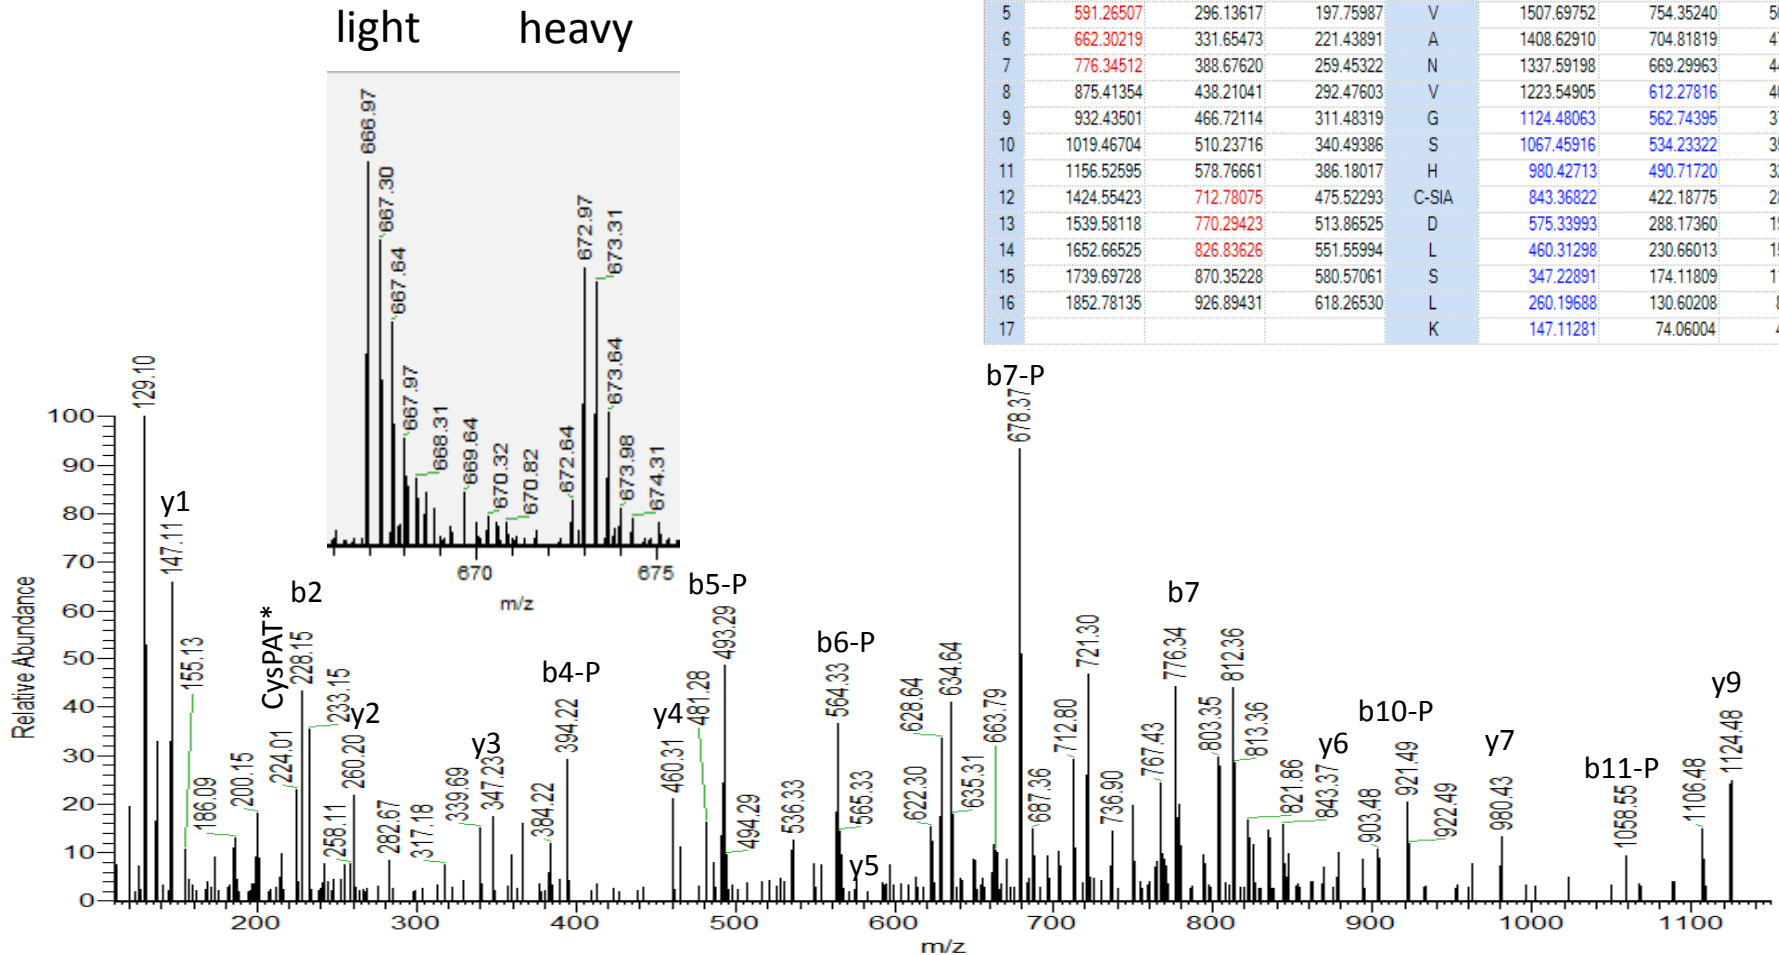



# Supplementary Figure S9

## Protein tyrosine phosphatase type IVA 1 STRING network

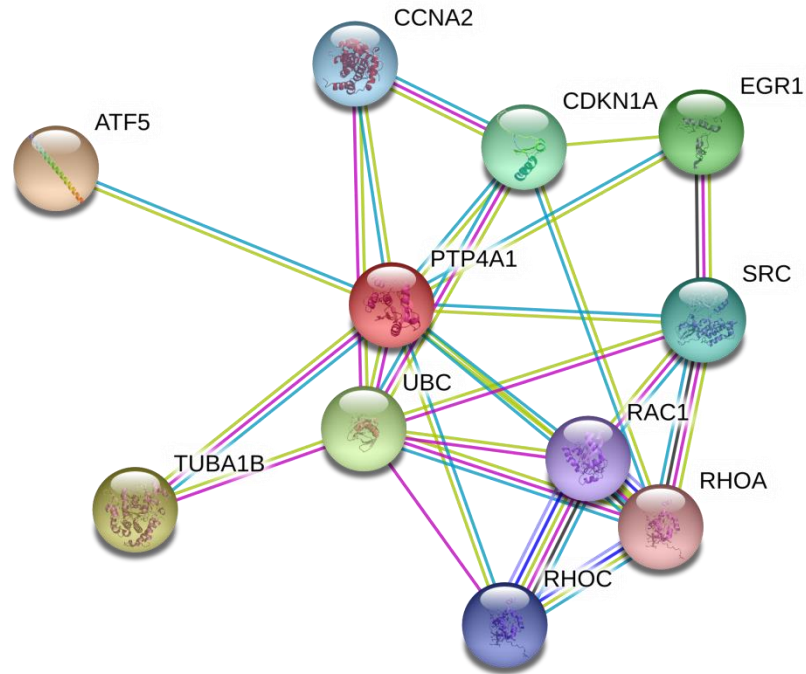

# Supplementary Figure S10

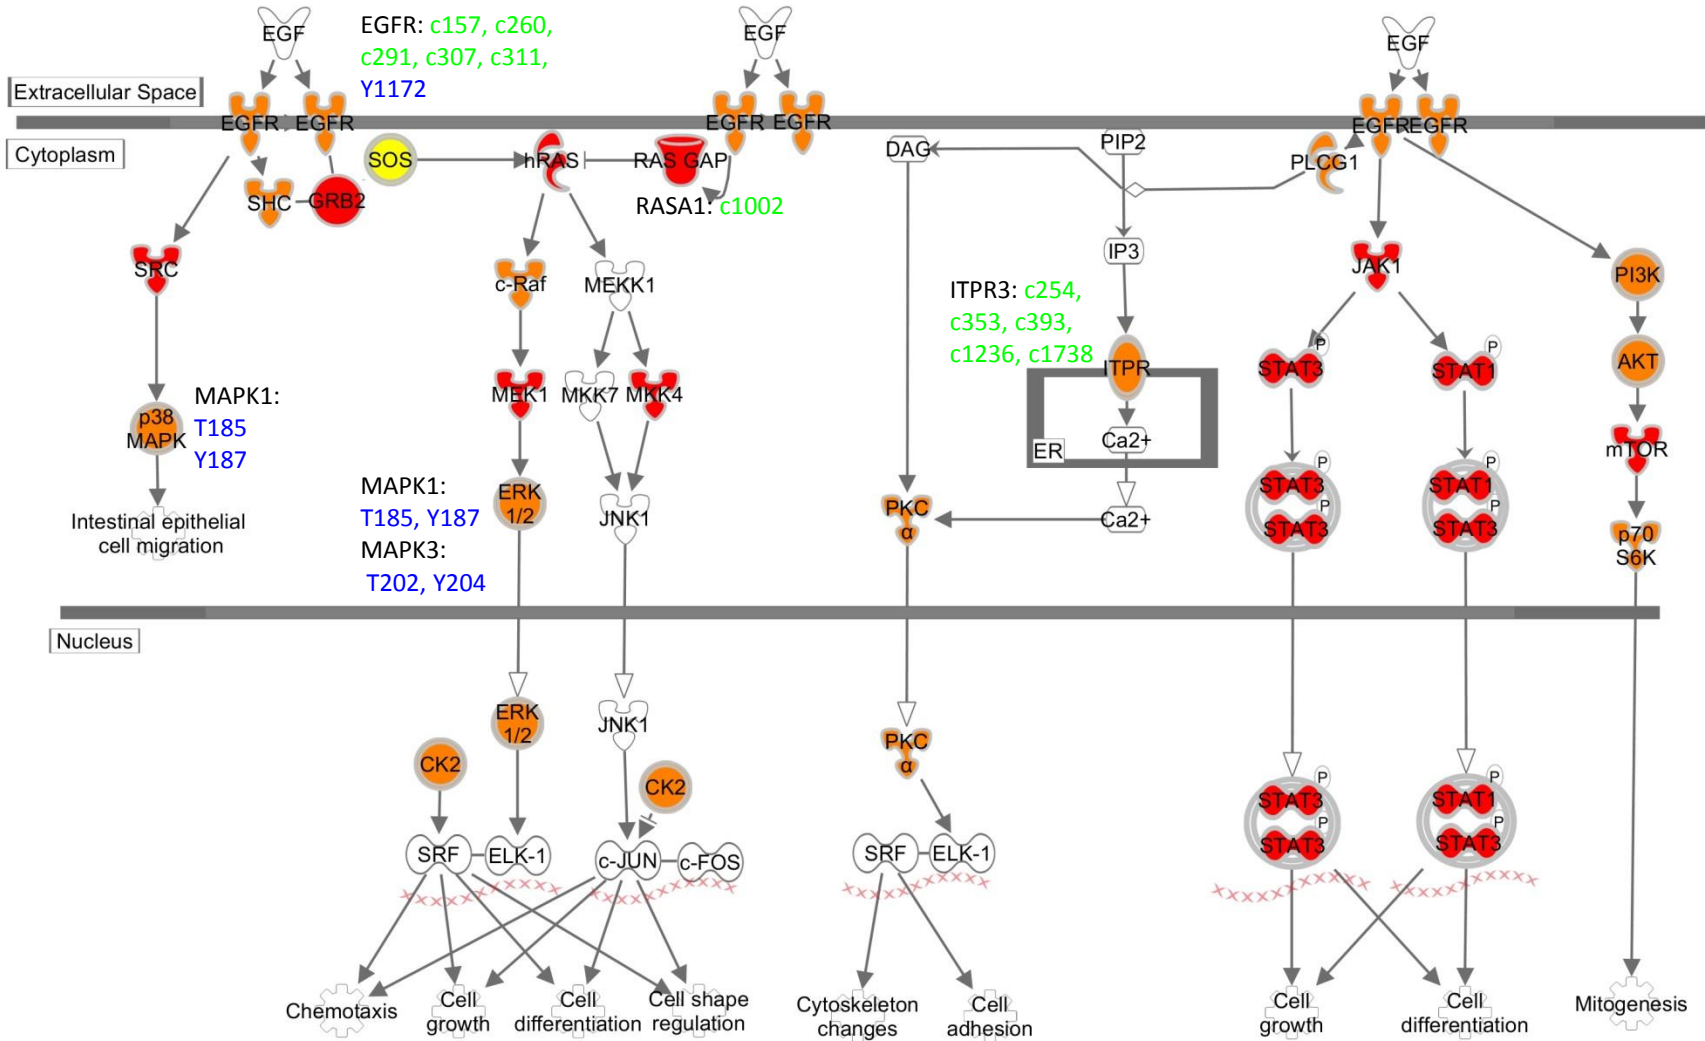

Red: with cys modification  
 Yellow: with phosphorylation  
 Orange: with both  
 Sites in green: downregulated  
 Sites in blue: upregulated

# Supplementary Figure S11

## Mitochondrial proteins identified with regulated reversible Cys

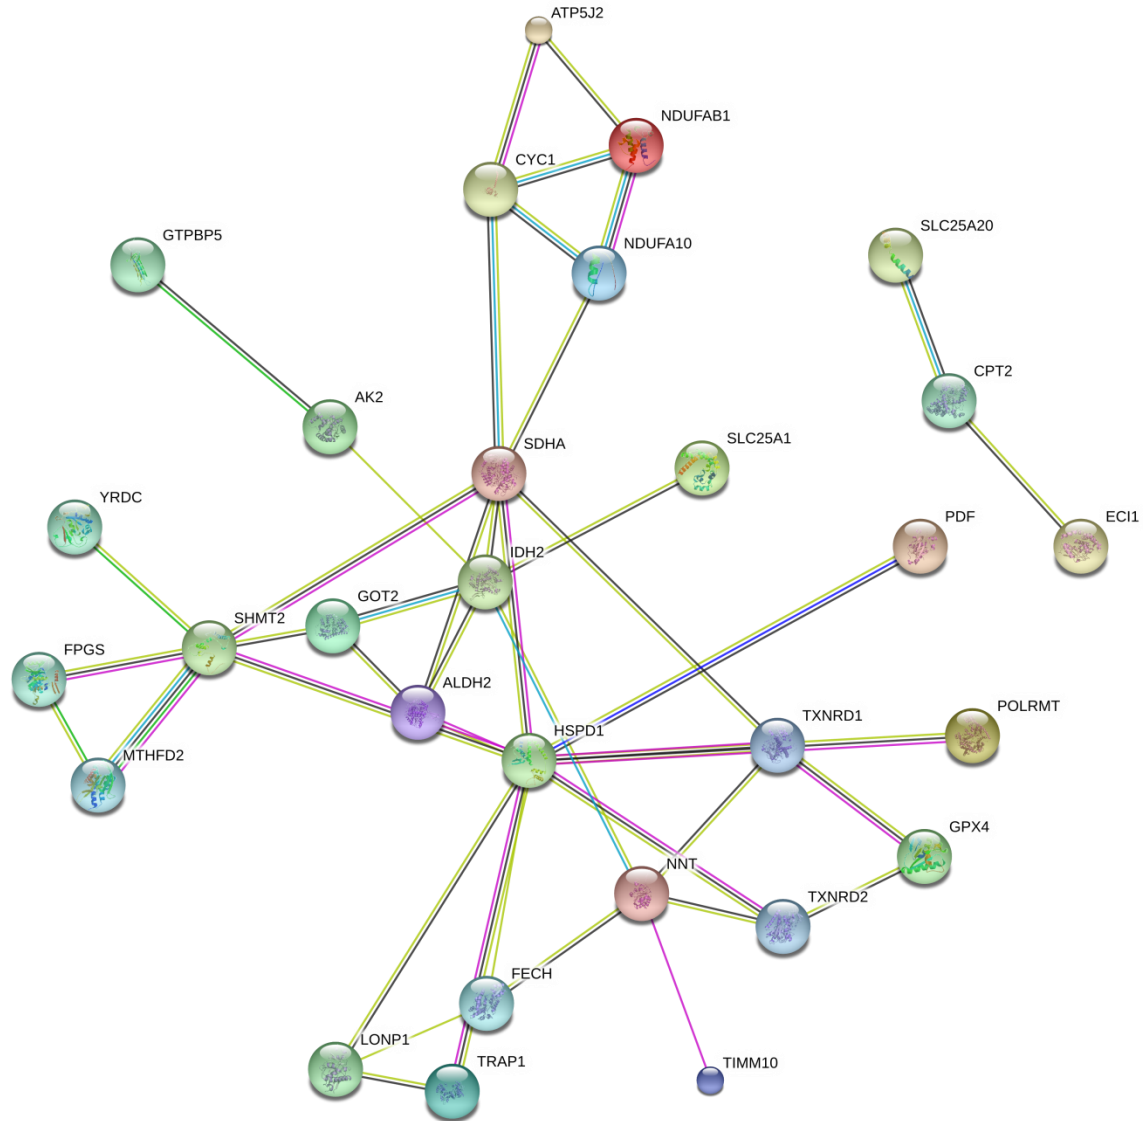

# Supplementary Figure S12

Redox related molecules with regulated reversible Cys

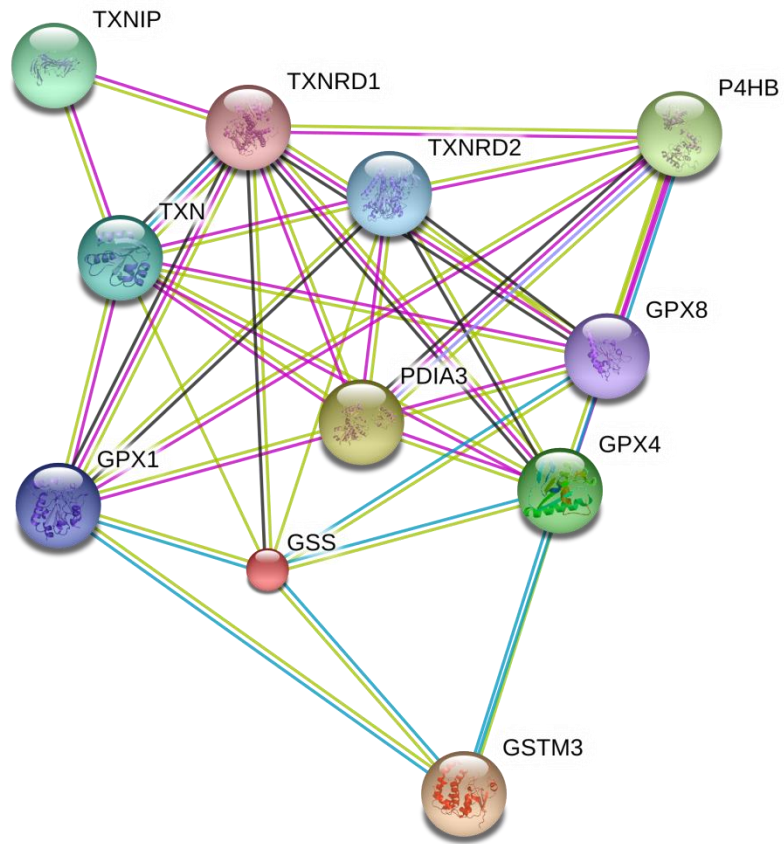

# Supplementary Figure S13

Ubiquitylation and Neddylation related proteins identified with regulated reversible Cys

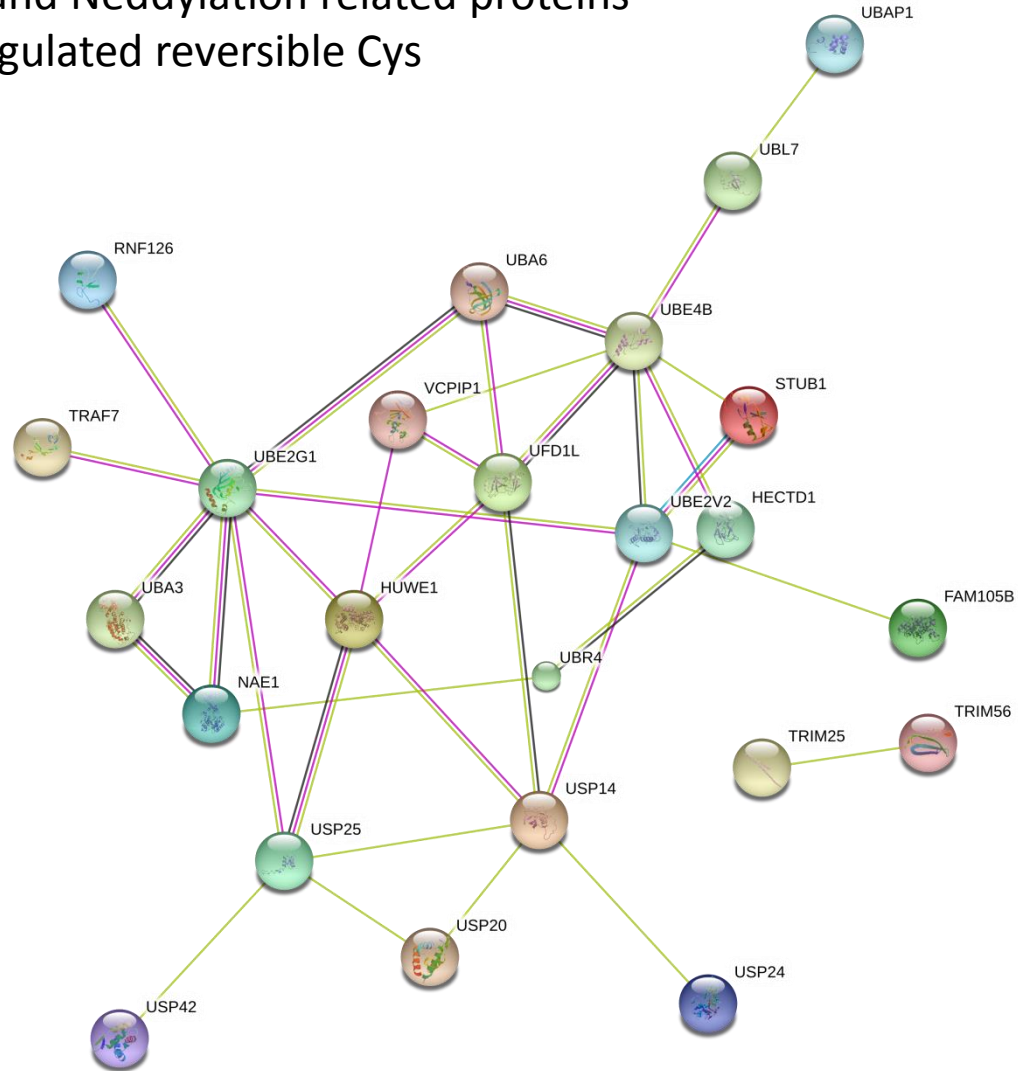

Supplement: 10.1074_M115.054551_mcp.M115.054551-3.pdf [file 10.1074_M115.054551_mcp.M115.054551-3.pdf]
