# Supplementary material for: Simultaneous Enrichment of Cysteine-containing Peptides and Phosphopeptides Using a Cysteine-specific Phosphonate Adaptable Tag (CysPAT) in Combination with titanium dioxide (TiO2) Chromatography
Source: PubMed Central journal article supplement (PMC5054350; doi:10.1074/mcp.m115.054551), 2016-10
Supplement: 10.1074_M115.054551_mcp.M115.054551-1.pdf [file 10.1074_M115.054551_mcp.M115.054551-1.pdf]

Figure 1

a)

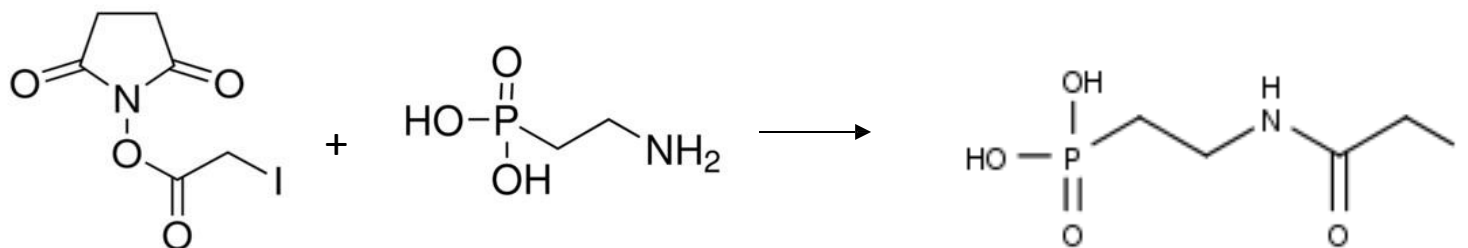

Succinimidyl iodoacetate(SIA)  
MW: 283,02

2-aminoethyl)phosphonic acid (AEP)  
MW: 125,06

(2-(2-iodoacetamido)ethyl)phosphonic acid  
MW: 292,93

b)

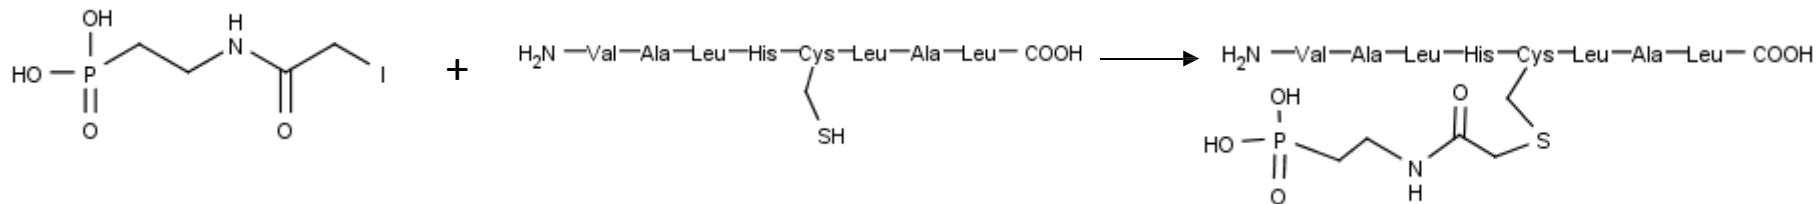

H<sub>2</sub>N-Val-Ala-Leu-His-Cys-Leu-Ala-Leu-COOH

H<sub>2</sub>N-Val-Ala-Leu-His-Cys-Leu-Ala-Leu-COOH

Figure 2

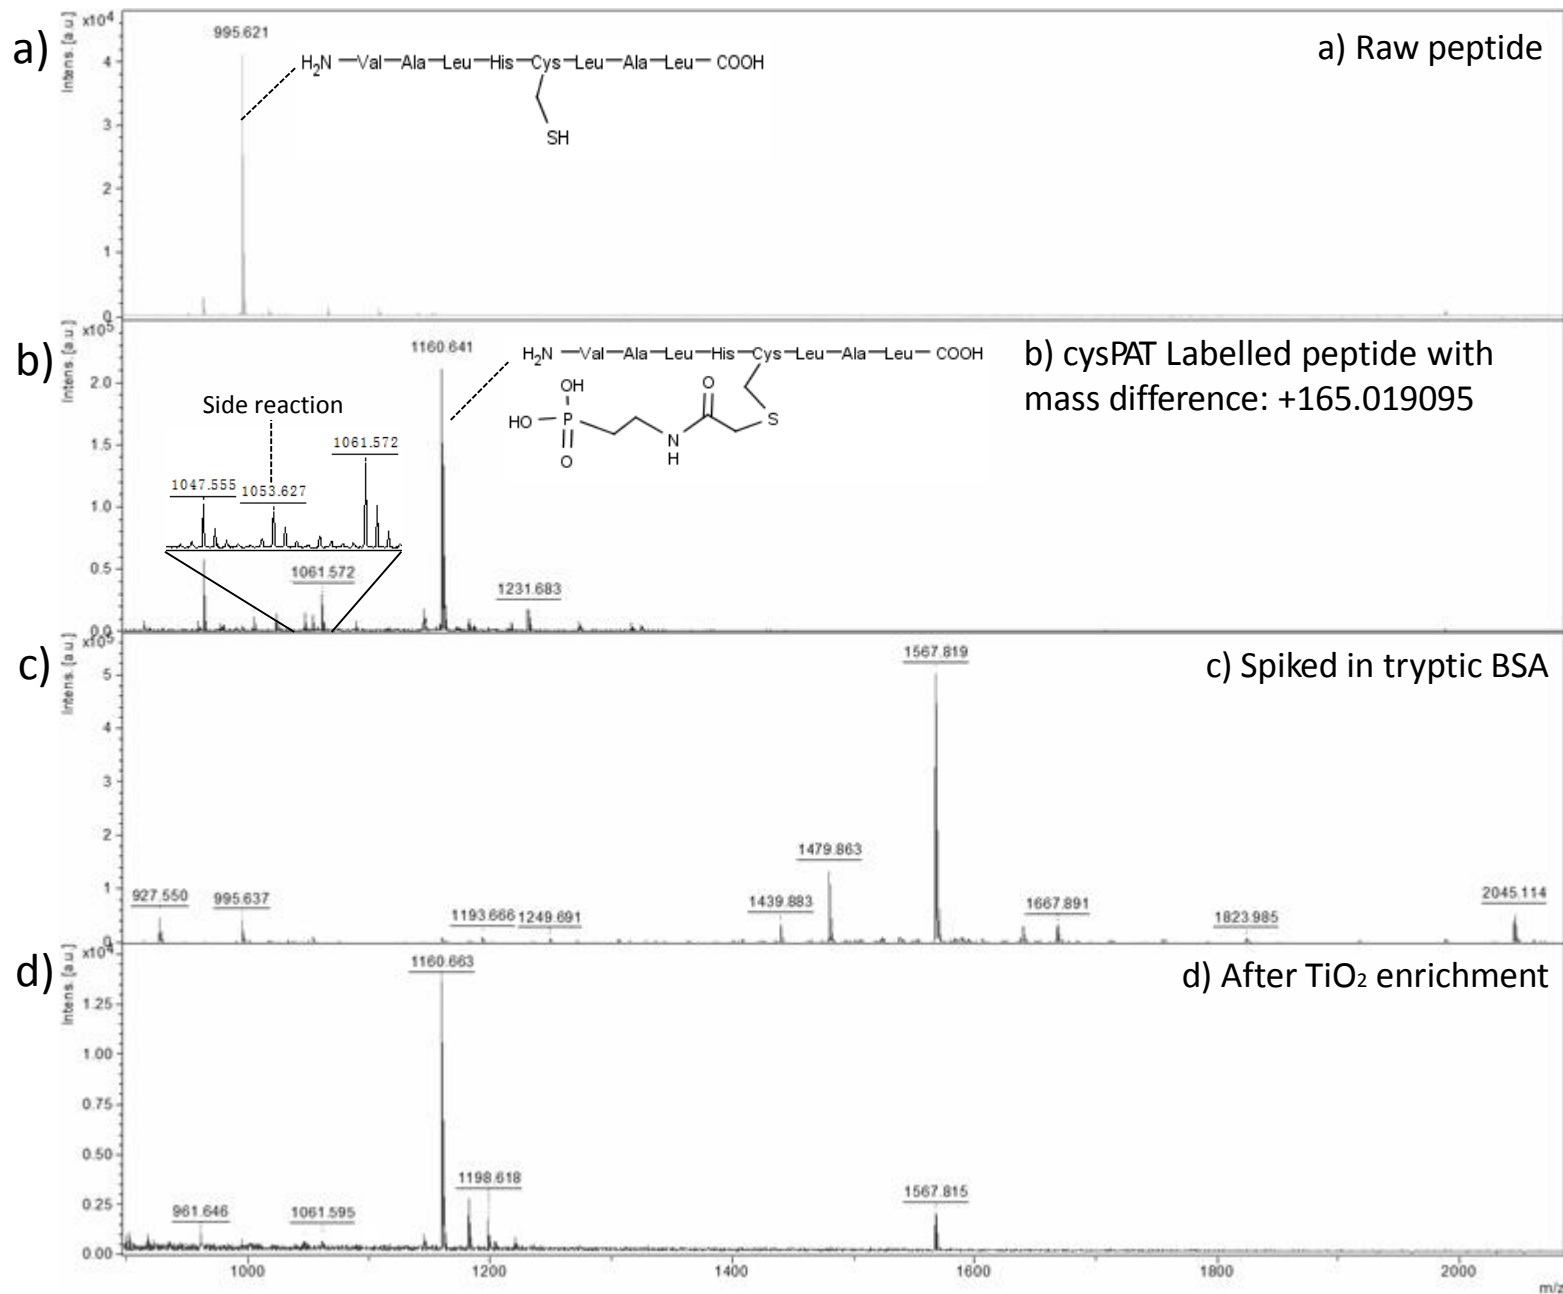

Figure 3

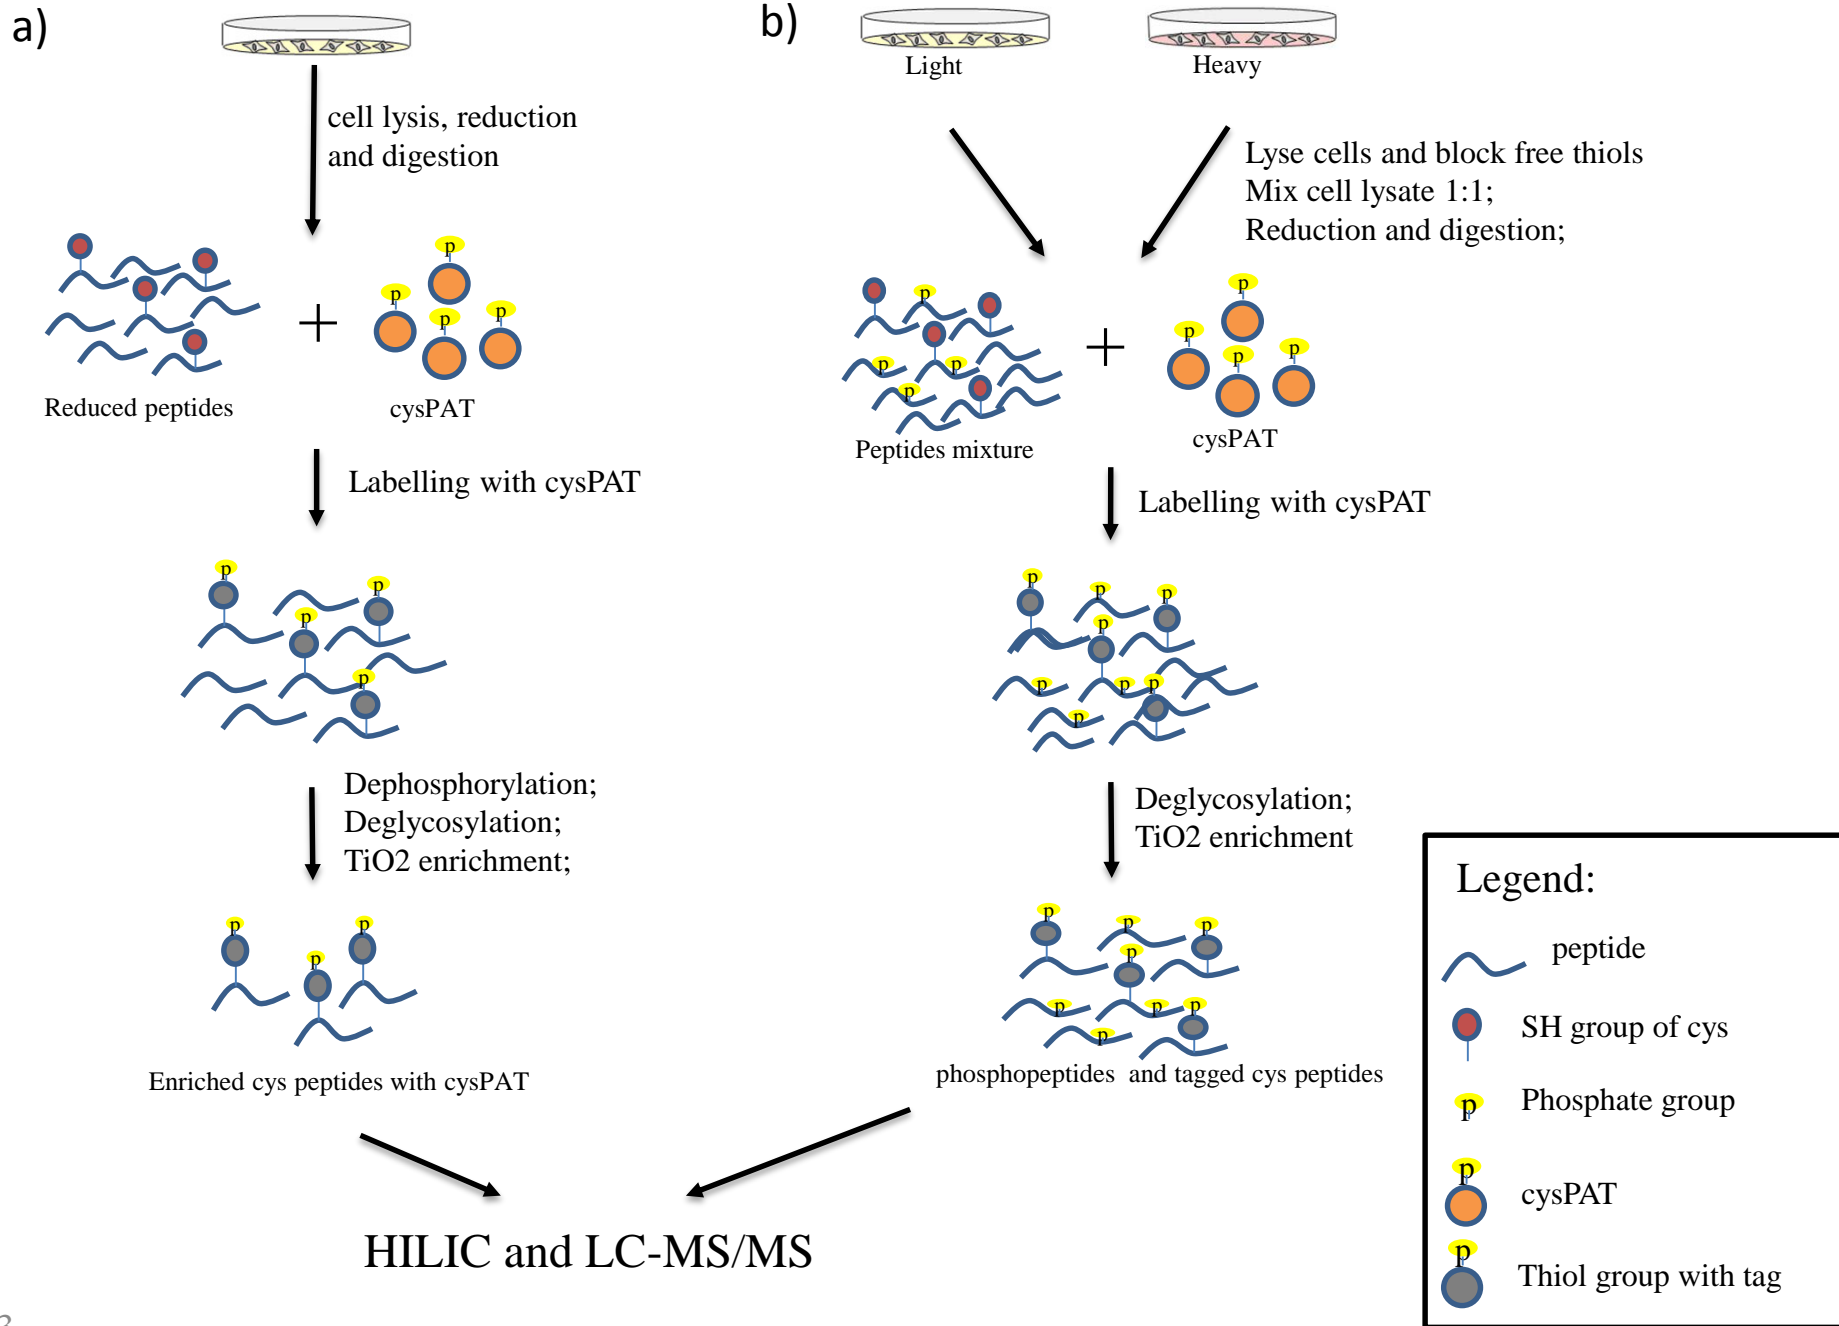

Figure 4

a) **Co-enriched proteins**

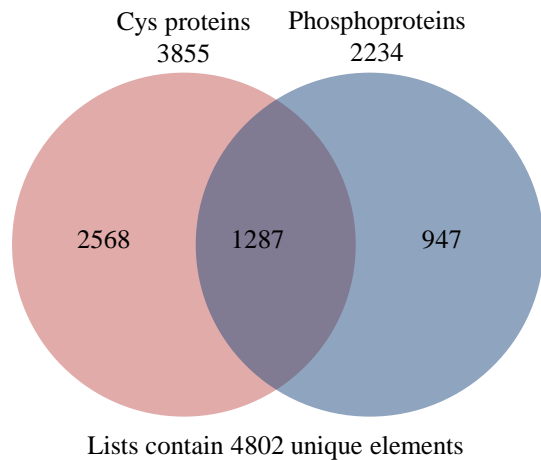

b) **Co-enriched unique peptides**

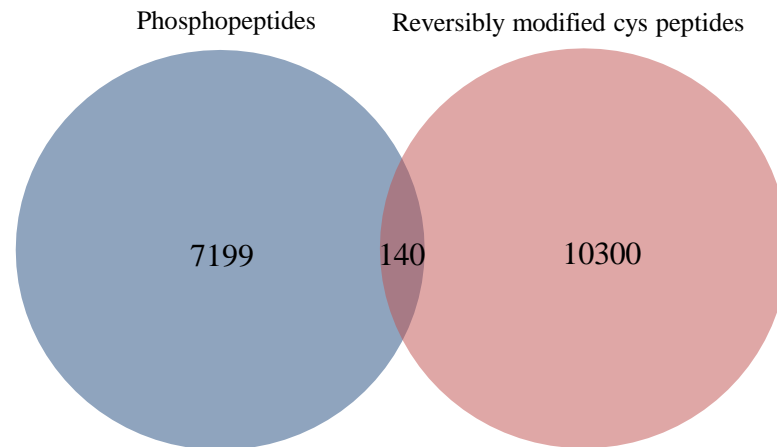

c) **PTM sites distribution**

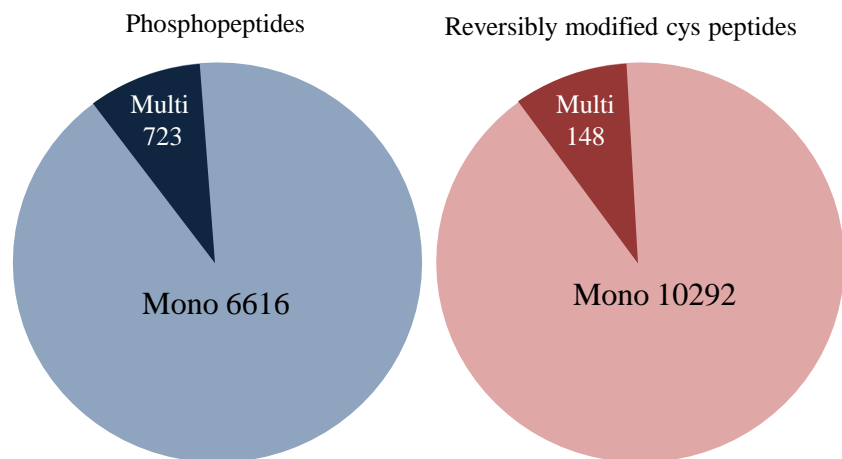

d) **PTM sites summary**

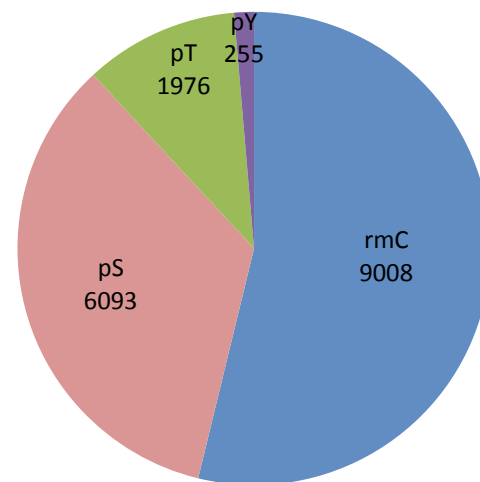

# Figure 5

Extracellular Space

Plasma Membrane

Cytoplasm

Nucleus

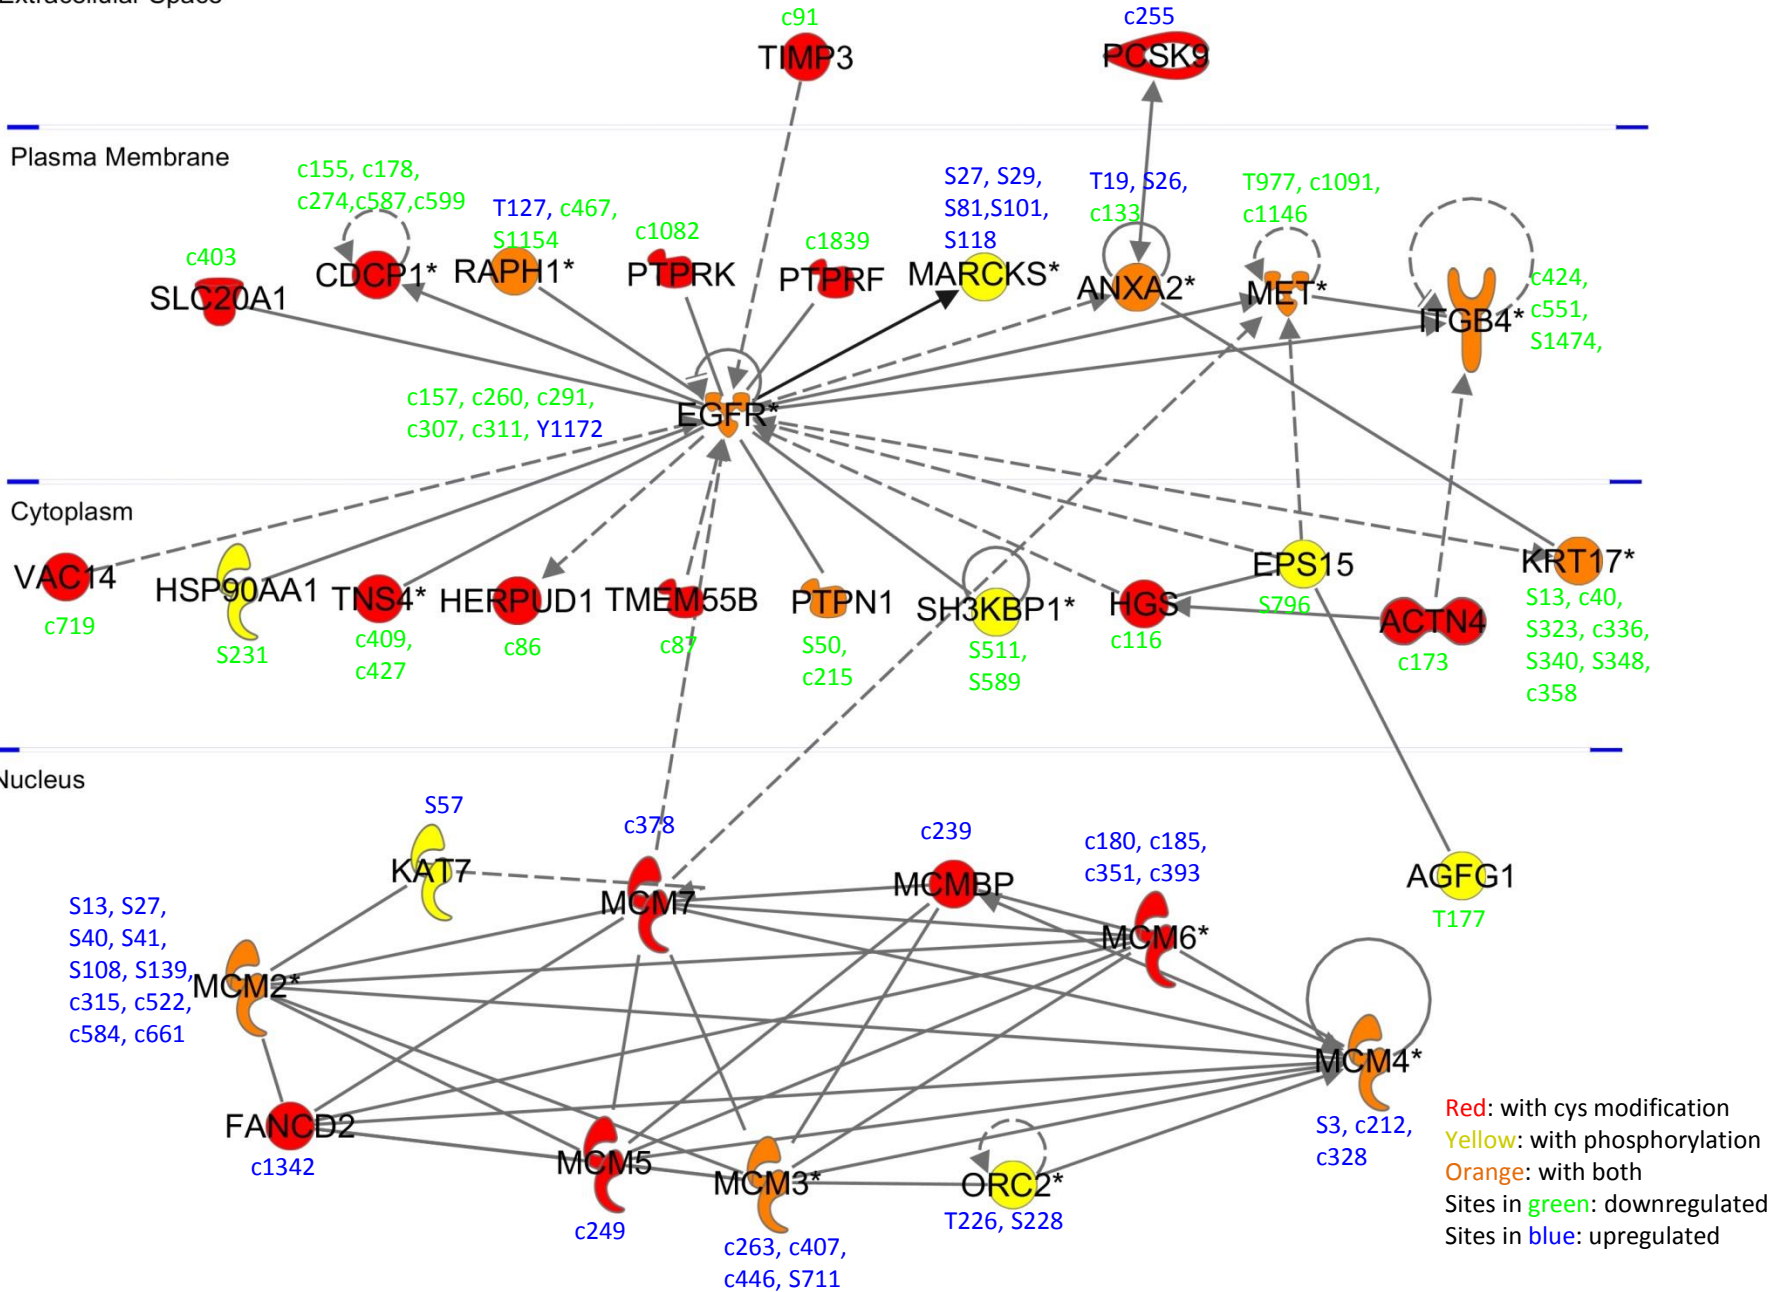

Figure 6

a)

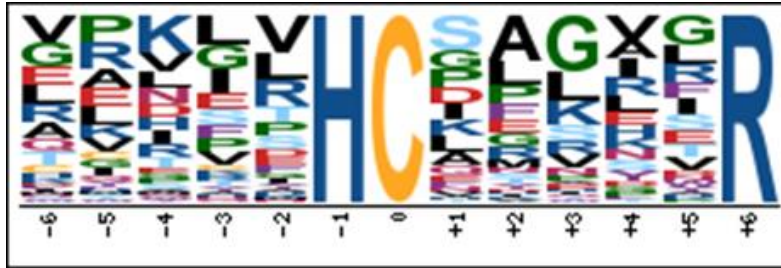

| Peptides                | PTPs   | Location | log <sub>2</sub> (H/L) | STD  |
|-------------------------|--------|----------|------------------------|------|
| ESGSLSPHEGPPVVH*CSAGIGR | PTPN1  | C215     | -1.08                  | 0.32 |
| EQFGQDGPITVH*CSAGVGR    | PTPRF  | C1839    | -2.37                  | 0.32 |
| LSNPPSAGPIVVH*CSAGAGR   | PTPRK  | C1082    | -2.30                  | 0.24 |
| GEAVGVH*CALGFGR         | DUSP23 | C95      | -1.97                  | NA   |
| ESGSLNPDHGPAVIH*CSAGIGR | PTPN2  | C216     | 0.21                   | NA   |
| VKACNPQYAGAIVVH*CSAGVGR | PTPRA  | C442     | -0.05                  | NA   |
| TIIH*CLNGGGR            | PTPRK  | C1376    | NA                     | NA   |

b)

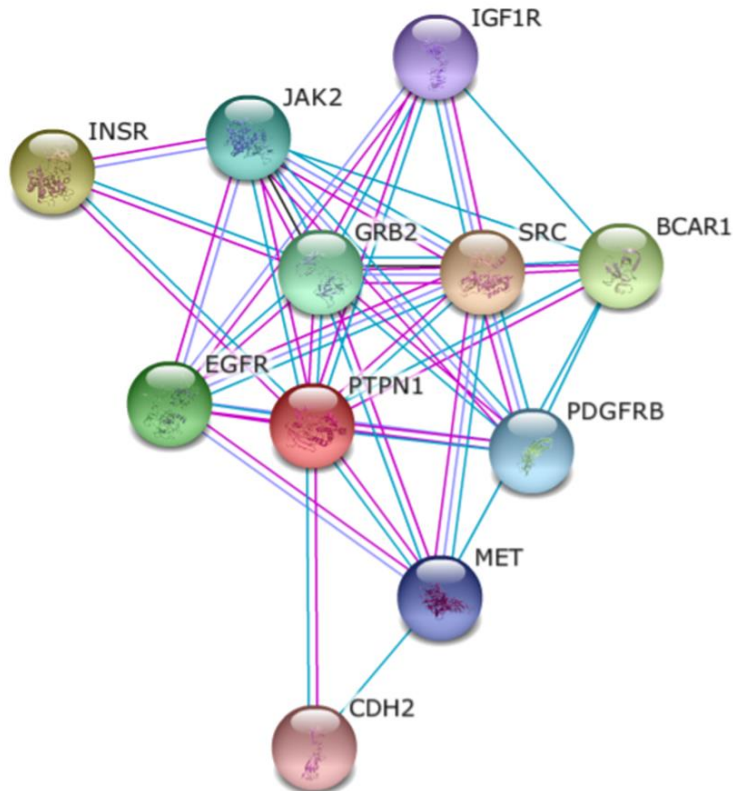

c)

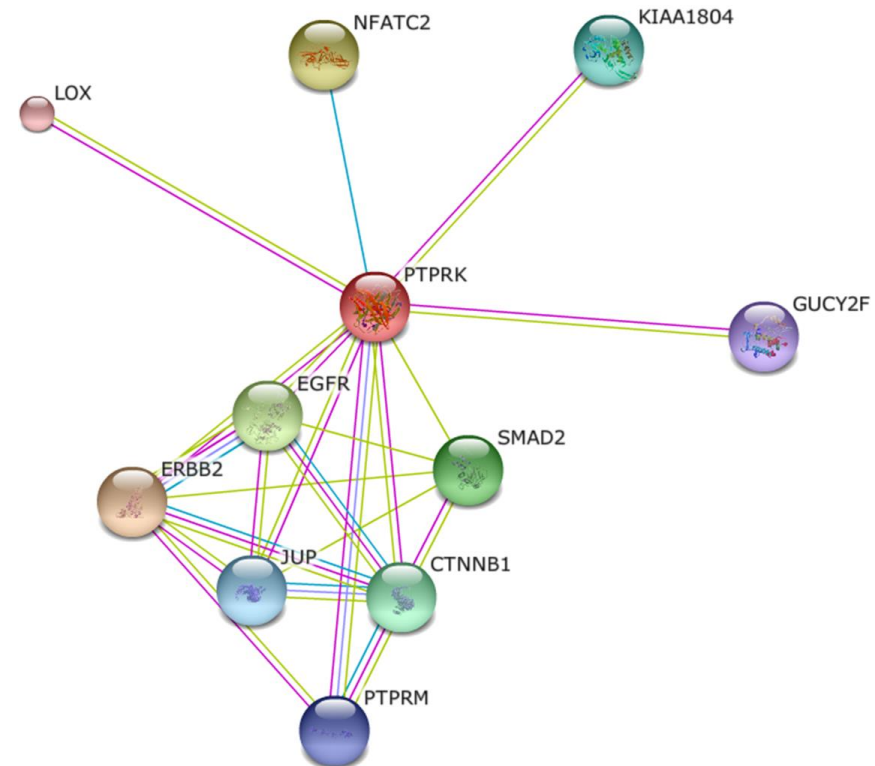

Figure 7

Up-regulated SIA proteins

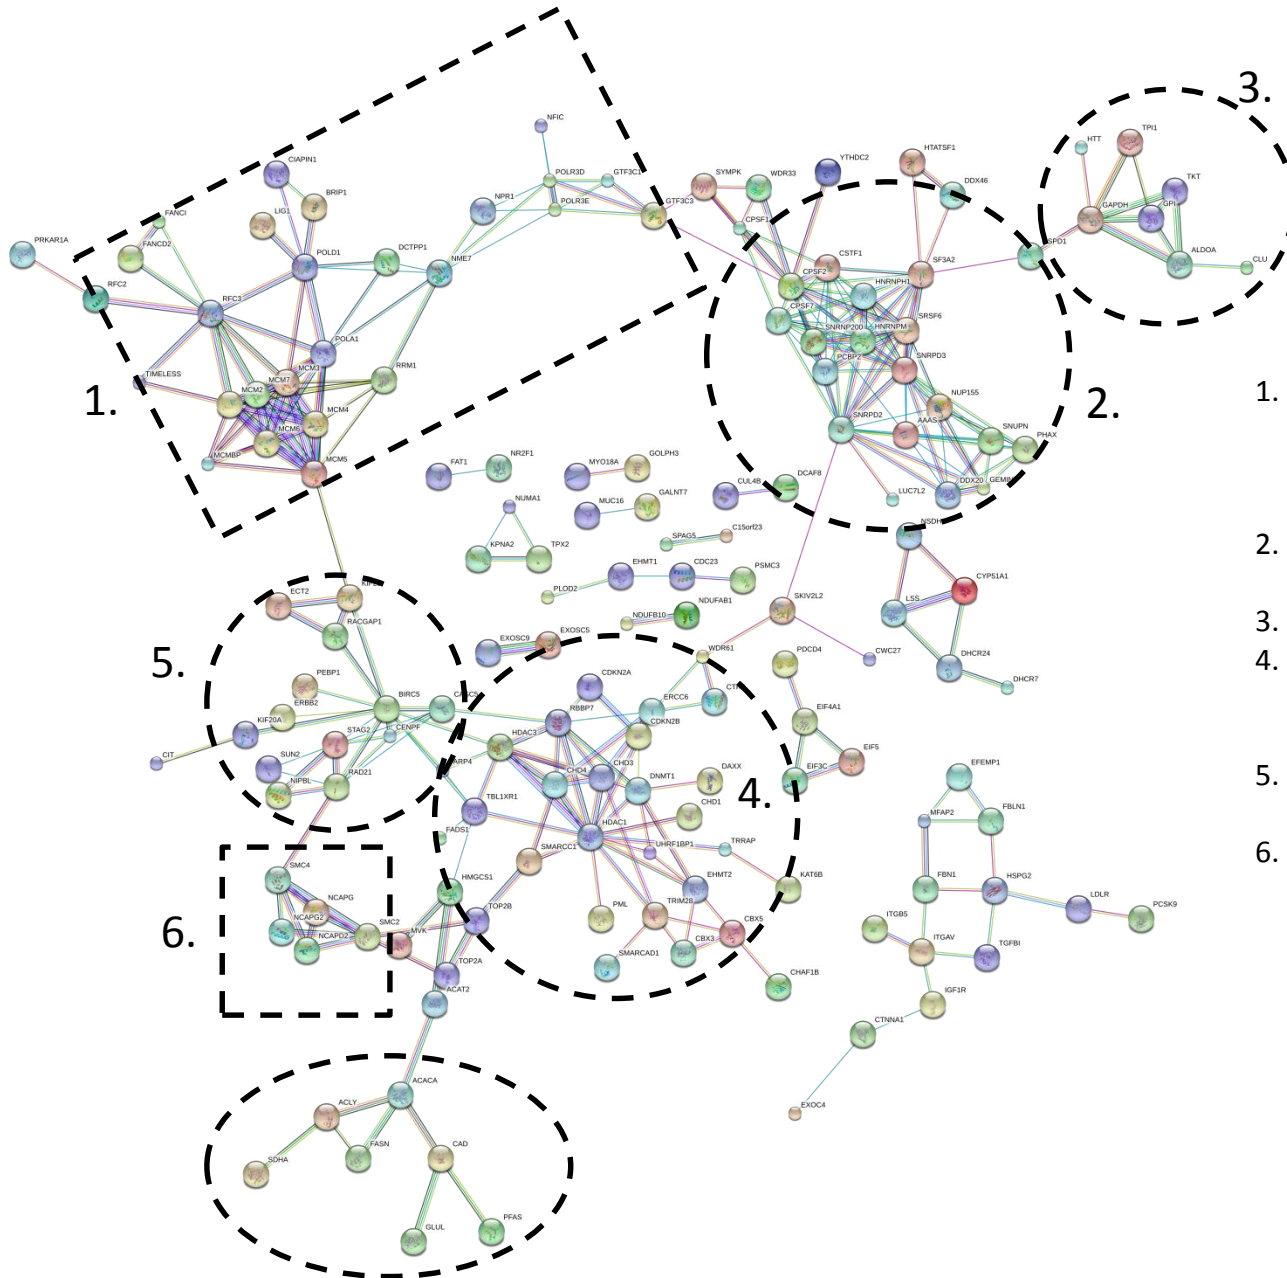

1. DNA replication, incl transcription factors, polymerases and the Minichromosome maintenance complex
2. Pre-mRNA processing transportation and splicing
3. Glycolysis
4. Chromatin remodeling, incl deacetylases and DNA methyltransferases
5. Cytokinesis and sister chromatid cohesion.
6. DNA condensin complex



Figure 8

Down-regulated SIA proteins

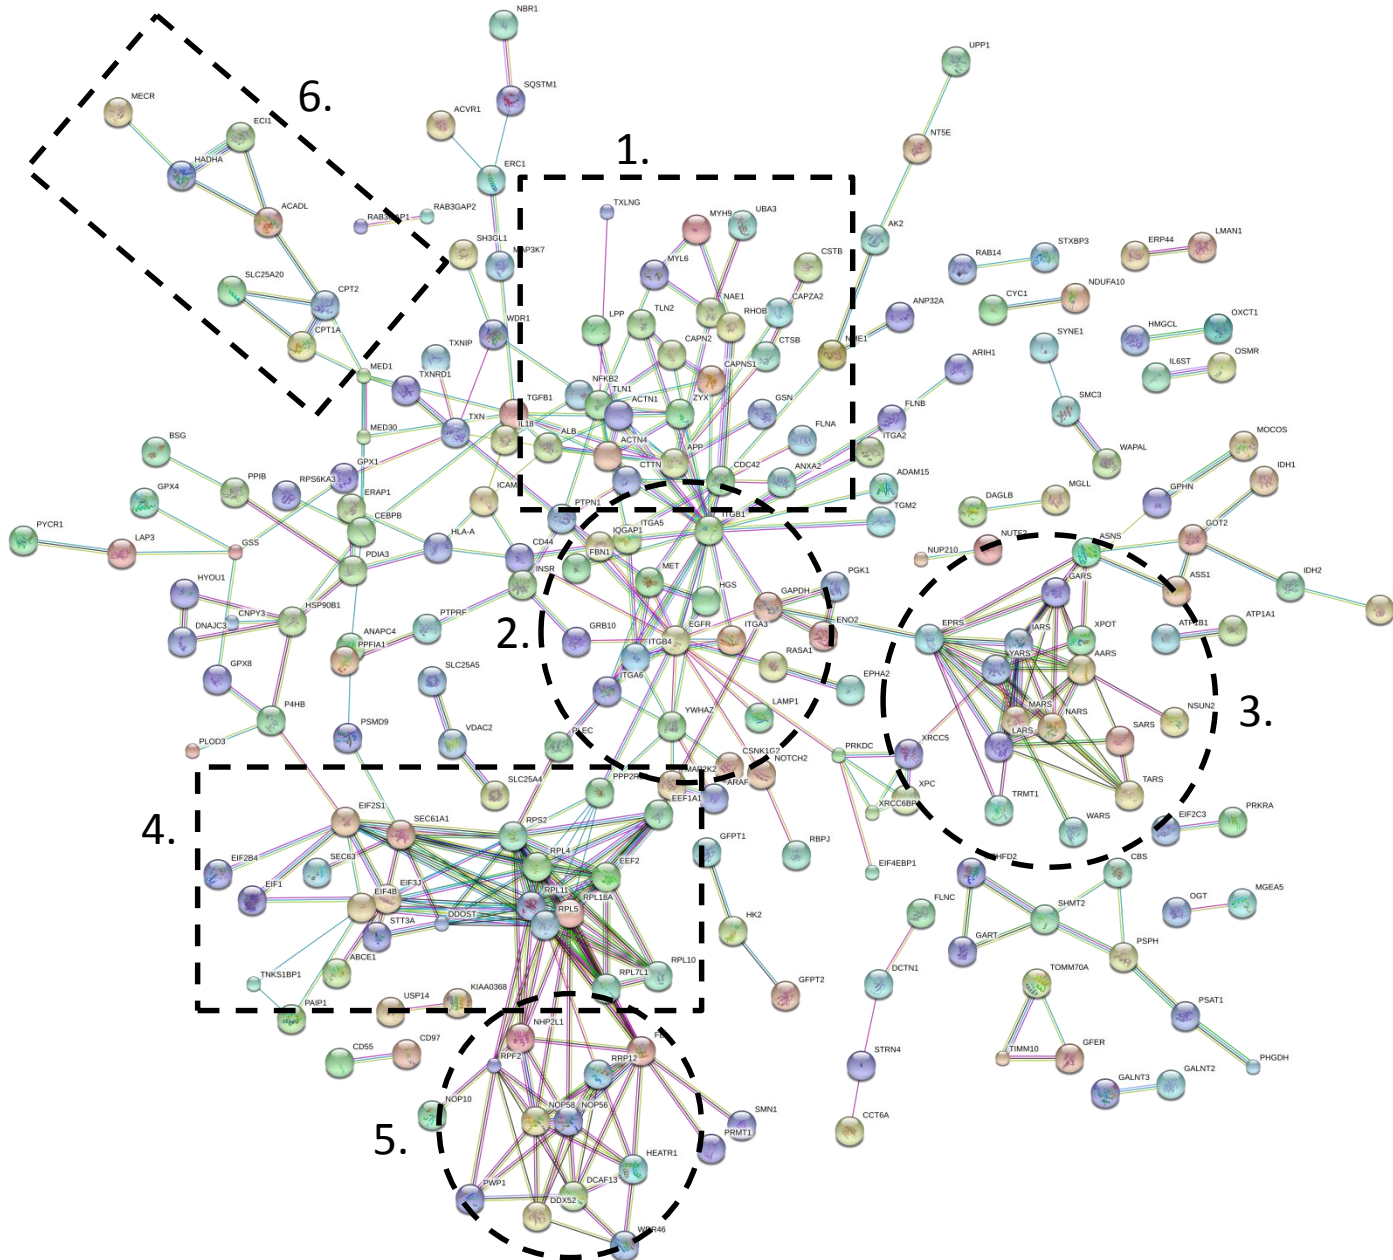

1. Integrin signaling with the cytoskeleton networks
2. EGFR signaling molecules
3. tRNA synthetases
4. Protein translation; ribosomes, initiation and elongation factors
5. Ribosomal biosynthesis and RNA splicing
6. fatty acid-oxidation
