# Supplementary material for: Simultaneous Enrichment of Cysteine-containing Peptides and Phosphopeptides Using a Cysteine-specific Phosphonate Adaptable Tag (CysPAT) in Combination with titanium dioxide (TiO2) Chromatography
Source: PubMed Central journal article supplement (PMC5054350; doi:10.1074/mcp.m115.054551), 2016-10
Supplement: 10.1074_M115.054551_mcp.M115.054551-2.pdf [file 10.1074_M115.054551_mcp.M115.054551-2.pdf]

# **Simultaneous enrichment of cysteine-containing peptides and phosphopeptides using a Cysteine-specific Phosphonate Adaptable Tag (CysPAT) in combination with TiO<sub>2</sub> chromatography**

**Honggang Huang, Martin Haar Petersen, Maria Ibanez Veja, Pernille S. Lassen, Martin R. Larsen and Giuseppe Palmisano**

**Supplementary figures and tables.**

**Supplementary Figure S1:** a) MALDI-MS/MS spectrum of CysPAT-labeled standard peptide (VALRHCLAL). b) ESI-MS/MS spectrum of the BSA-derived peptide labeled with CysPAT. The presence of a diagnostic ion at 224.01 m/z is shown. c) Possible structure of the CysPAT diagnostic ion.

**Supplementary Figure S2:** All the Cys sites in BSA were identified after enrichment from CysPAT labeled BSA peptides.

**Supplementary Figure S3:** a) Charge state distribution and b) hydrophobicity of peptides after CysPAT or IAA labelling.

**Supplementary Figure S4:** The differential elution pattern of phosphopeptides and CysPAT labelled Cys peptides in HILIC chromatography. The number of peptides reported include the other variable modifications used for database search.

**Supplementary Figure S5:** The statistical summary of regulated peptides and proteins.

**Supplementary Figure S6:** MS and MS/MS spectra of the CysPAT-tagged peptide (GVV\*CIDEFDK) belonging to DNA replication licensing factor MCM3 protein. \*C indicates the CysPAT-tagged cysteine. CysPAT\* at 224.01 m/z indicates the CysPAT diagnostic ion.

**Supplementary Figure S7:** MS and MS/MS spectra of the CysPAT-tagged peptide (ESGSLSPHEGPVVVH\*CSAGIGR) belonging to Tyrosine-protein phosphatase non-receptor type 1 (PTP1B/PTPN1) protein. \*C indicates the CysPAT-tagged cysteine. CysPAT\* at 224.01 m/z indicates the CysPAT diagnostic ion.

**Supplementary Figure S8:** MS and MS/MS spectra of the phosphorylated and CysPAT-tagged peptide (RAP\*SVANVGSH\*CDLSLK) belonging to Filamin A protein. \*S indicates the phosphorylated site and \*C indicated the CysPAT-tagged cysteine. CysPAT\* at 224.01 m/z indicates the CysPAT diagnostic ion.

**Supplementary Figure S9:** Protein-protein interaction network of protein tyrosine phosphatase type IVA 1 using STRING.

**Supplementary Figure S10: The proteins identified with PTM sites in the EGFR signaling pathway.** Proteins identified with PTM sites were marked in color, in red: with only Cys modification; in yellow: with only phosphorylation; in orange: with both PTMs. Only the significantly regulated PTM sites were indicated in color, in green: downregulated; in blue: upregulated.

**Supplementary Figure S11:** Protein-protein interaction network of mitochondrial proteins identified with regulated reversible Cys residues using STRING.

**Supplementary Figure S12:** Protein-protein interaction network of redox related proteins with regulated reversible Cys residues using STRING.

**Supplementary Figure S13:** Protein-protein interaction network of ubiquitinylation and neddylation related proteins identified with regulated reversible Cys

**Supplementary Table S1:** List of identified unique peptides from HeLa cell lysate enriched for the total cysteine experiment. Peptides sequences with CysPAT labeling, indicated as SIA, and N-terminal protein acetylation are reported. Database search identification output reports protein groups, PSMs, number of CysPAT labeling, missed cleavage, m/z, retention time, q-value, Ion score, rank and search engine rank.

**Supplementary Table S2:** List of identified unique peptides from HeLa cell lysate enriched for the reversibly modified cysteines. Peptides sequences with CysPAT labeling, indicated as SIA, and N-terminal protein acetylation are reported. Database search identification output reports protein groups, PSMs, number of CysPAT labeling, missed cleavage, m/z, retention time, q-value, Ion score, rank and search engine rank.

**Supplementary Table S3:** List of identified unique peptides by the simultaneous enrichment of reversibly modified Cys peptides and phosphopeptides from SILAC labelled HeLa cells subject to 5 min EGF stimulation. Peptides sequences with CysPAT labeling, indicated as SIA, and N-terminal protein acetylation are reported. Database search identification output reports protein groups, PSMs, number of CysPAT labeling, missed cleavage, m/z, retention time, q-value, Ion score, rank, search engine rank, phosphoRS score.

**Supplementary Table S4:** List of mapped reversibly modified Cys sites and phosphorylation sites with information of localization on protein, motif window and site annotation retrieved from Uniprot database

**Supplementary Table S5:** List of significantly regulated peptides with PTM sites and statistical information.

**Supplementary Table S6:** List of significantly regulated peptides from proteins in the EGFR network and EGFR signaling pathway.

**Supplementary Table S7:** List of identified peptides with HC(X5)R motif and related sites and protein information.
